# Supplementary material for: The role of nutrition education in the pharmacy curriculum using the example of knowledge about the health benefits of nuts
Source: PubMed Central journal article supplement (PMC11625810; doi:10.3389/fpubh.2024.1481265), 2024-11-25
Supplement: Data_Sheet_1.pdf [file Data_Sheet_1.pdf]

## Supplementary file

### *Demographic data (age, height, weight, BMI)*

|                                                         | <b>N</b> | <b>Min</b> | <b>Max</b> | <b>Mean</b> | <b>SD</b> |
|---------------------------------------------------------|----------|------------|------------|-------------|-----------|
| <b>Age (years)</b>                                      | 509      | 18         | 35         | 23.05       | 2.545     |
| <b>Height (cm)</b>                                      | 507      | 150.0      | 200.0      | 171.212     | 8.3437    |
| <b>Weight (kg)</b>                                      | 509      | 42.0       | 148.0      | 64.112      | 12.1101   |
| <b>BMI</b>                                              |          |            |            |             |           |
|                                                         | 507      | 15.9       | 43.7       | 21.7706     | 2.98811   |
| $\frac{\text{Weight (kg)}}{(\text{height in metre})^2}$ |          |            |            |             |           |

\*SD – standard deviation; BMI – body mass index

### *Respondents by BMI categories*

| BMI             |                        | <b>N = 507</b> | <b>%</b> |
|-----------------|------------------------|----------------|----------|
| BMI < 18.5      | <b>Underweight</b>     | 40             | 7.9      |
| 18.5 ≤ BMI < 25 | <b>Healthy weight</b>  | 408            | 80.5     |
| 25 ≤ BMI < 30   | <b>Overweight</b>      | 53             | 10.5     |
| 30 ≤ BMI < 40   | <b>Obesity</b>         | 4              | 0.8      |
| BMI ≥ 40        | <b>Extreme obesity</b> | 2              | 0.4      |

### *Information about passed exams in Bromatology and Nutrition*

|                                         | Bromatology (N=509) |          | Nutrition (N=509) |          |
|-----------------------------------------|---------------------|----------|-------------------|----------|
|                                         | <b>N</b>            | <b>%</b> | <b>N</b>          | <b>%</b> |
| Yes                                     | 242                 | 47.5     | 187               | 36.7     |
| No                                      | 136                 | 26.7     | 181               | 35.4     |
| I do not have that exam in my curricula | 131                 | 25.7     | 140               | 27.4     |

*Assessment of lifestyle related to physical activity (1 – predominantly sedentary, 5 – very active)*

*Number of hours spent in moderate physical activities and sitting*

|                                     | <b>N</b> | <b>Min</b> | <b>Max</b> | <b>Mean</b> | <b>SD</b> |
|-------------------------------------|----------|------------|------------|-------------|-----------|
| <b>physical activities (h/week)</b> | 509      | 0          | 234        | 4.86        | 12.060    |
| <b>Sitting/lying down (h/day)</b>   | 500      | 1          | 23         | 8.77        | 3.941     |

*List of foods that the respondents marked as allergens*

|                                                                      | <b>N</b> | <b>%</b> |
|----------------------------------------------------------------------|----------|----------|
| Milk and milk products                                               | 9        | 26.47    |
| Eggs                                                                 | 2        | 5.88     |
| Fish and seafood                                                     | 3        | 8.82     |
| Cereals containing gluten (wheat, barley, oats, rye)                 | 4        | 11.76    |
| Nuts (hazelnuts, almonds, walnuts, cashews, Brazil nuts, pistachios) | 4        | 11.76    |
| Peanuts                                                              | 4        | 11.76    |
| Sulfur-dioxide                                                       | 1        | 2.94     |
| Orange                                                               | 1        | 2.94     |
| Honey                                                                | 1        | 2.94     |
| Strawberries                                                         | 2        | 5.88     |
| Cherries                                                             | 1        | 2.94     |
| Kiwi                                                                 | 5        | 14.71    |
| Raspberries                                                          | 1        | 2.94     |
| Cinnamon                                                             | 1        | 2.94     |
| Onion                                                                | 1        | 2.94     |
| Apricots                                                             | 1        | 2.94     |
| Apples                                                               | 2        | 5.88     |

|         |   |      |
|---------|---|------|
| Peaches | 2 | 5.88 |
|---------|---|------|

Possession of knowledge about the health effects of nuts

|                                 |                         | Possession of knowledge<br>about the health effects of nuts |    |                  |       |
|---------------------------------|-------------------------|-------------------------------------------------------------|----|------------------|-------|
|                                 |                         | Yes                                                         | No | I do not<br>know | Total |
| Faculty type<br>N=509           | Faculty of<br>pharmacy  | 279<br>72.8% out of<br>383                                  | 26 | 77               | 383   |
|                                 | Non-pharmacy<br>faculty | 64<br>50.4% out of<br>127                                   | 20 | 43               | 127   |
|                                 | Total                   | 343                                                         | 46 | 120              | 509   |
| Exam in<br>Bromatology<br>N=509 | Passed                  | 198                                                         | 7  | 37               | 242   |
|                                 | Not passed              | 83                                                          | 15 | 38               | 136   |
|                                 | Do not have<br>exam     | 62<br>47.3% out of<br>131                                   | 24 | 45               | 131   |
|                                 | Total                   | 343                                                         | 46 | 120              | 509   |
| Exam in<br>Nutrition<br>N=508   | Passed                  | 153                                                         | 6  | 28               | 187   |
|                                 | Not passed              | 121                                                         | 15 | 45               | 181   |
|                                 | Do not have<br>exam     | 68<br>48.5% out of<br>140                                   | 25 | 47               | 140   |
|                                 | Total                   | 342                                                         | 46 | 120              | 508   |

*Students' knowledge of nuts*

| Question                                                                                                            | Answer                 | Correct answers<br>(N = 509) | Correct answers<br>(%) |
|---------------------------------------------------------------------------------------------------------------------|------------------------|------------------------------|------------------------|
| <b>1. In the dietary recommendations (nutrition pyramid), nuts are classified together with the group of foods:</b> | Cereals                | 141                          | 27.7                   |
|                                                                                                                     | milk and milk products | 14                           | 2.8                    |
|                                                                                                                     | Fruits                 | 107                          | 21.0                   |
|                                                                                                                     | vegetables             | 4                            | .8                     |
|                                                                                                                     | <i>meat and eggs</i>   | 67                           | 13.2                   |
|                                                                                                                     | Oils                   | 42                           | 8.3                    |
|                                                                                                                     | I do not know          | 134                          | 26.3                   |
| <b>2. Nuts are an important food group in the Mediterranean diet:</b>                                               | <i>Yes</i>             | 300                          | 58.9                   |
|                                                                                                                     | No                     | 35                           | 6.9                    |
|                                                                                                                     | I do not know          | 174                          | 34.2                   |
| <b>3. Nuts are an important food group in the DASH diet:</b>                                                        | <i>Yes</i>             | 150                          | 29.5                   |
|                                                                                                                     | No                     | 18                           | 3.5                    |
|                                                                                                                     | I do not know          | 341                          | 67.0                   |
| <b>4. Nuts are definitely not a source of which mineral in the diet?</b>                                            | Selenium               | 10                           | 2.0                    |
|                                                                                                                     | <i>Iodine</i>          | 181                          | 35.6                   |
|                                                                                                                     | magnesium              | 31                           | 6.1                    |
|                                                                                                                     | Iron                   | 31                           | 6.1                    |
|                                                                                                                     | Zinc                   | 30                           | 5.9                    |
|                                                                                                                     | I do not know          | 226                          | 44.4                   |
| <b>5. Nuts are a rich source of which vitamin in the diet?</b>                                                      | vitamin A              | 24                           | 4.7                    |
|                                                                                                                     | vitamin C              | 14                           | 2.8                    |
|                                                                                                                     | <i>vitamin E</i>       | 200                          | 39.3                   |
|                                                                                                                     | vitamin D              | 19                           | 3.7                    |
|                                                                                                                     | vitamin B12            | 88                           | 17.3                   |

|                                                                                                                                                                                                                                             |                      |     |      |
|---------------------------------------------------------------------------------------------------------------------------------------------------------------------------------------------------------------------------------------------|----------------------|-----|------|
|                                                                                                                                                                                                                                             | I do not know        | 164 | 32.2 |
| <b>6. Which of the nuts representatives is considered a good source of dietary selenium?</b>                                                                                                                                                | Almond               | 52  | 10.2 |
|                                                                                                                                                                                                                                             | Hazelnut             | 8   | 1.6  |
|                                                                                                                                                                                                                                             | <i>Brazilian nut</i> | 121 | 23.8 |
|                                                                                                                                                                                                                                             | Walnut               | 26  | 5.1  |
|                                                                                                                                                                                                                                             | Cashew               | 69  | 13.6 |
|                                                                                                                                                                                                                                             | I do not know        | 233 | 45.8 |
| <b>7. Nuts are primarily a source of which polyunsaturated fatty acid?</b>                                                                                                                                                                  | EPA                  | 39  | 7.7  |
|                                                                                                                                                                                                                                             | DHA                  | 28  | 5.5  |
|                                                                                                                                                                                                                                             | <i>linoleic acid</i> | 42  | 8.3  |
|                                                                                                                                                                                                                                             | alpha-linolenic acid | 63  | 12.4 |
|                                                                                                                                                                                                                                             | arachidonic acid     | 35  | 6.9  |
|                                                                                                                                                                                                                                             | I do not know        | 302 | 59.3 |
| <b>8. Which of nuts has the highest content of saturated fatty acids and is therefore the least recommended in the diet compared to other stone fruits?</b>                                                                                 | Peanuts              | 219 | 43.0 |
|                                                                                                                                                                                                                                             | Almond               | 30  | 5.9  |
|                                                                                                                                                                                                                                             | Walnut               | 23  | 4.5  |
|                                                                                                                                                                                                                                             | Hazelnut             | 8   | 1.6  |
|                                                                                                                                                                                                                                             | <i>Cashew</i>        | 56  | 11.0 |
|                                                                                                                                                                                                                                             | I do not know        | 173 | 34.0 |
| <b>9. There is an approved health claim for walnuts that reads: "Walnuts contribute to improving the elasticity of blood vessels." The stated health statement refers to the daily intake of walnuts in which of the stated quantities?</b> | 10g                  | 42  | 8.3  |
|                                                                                                                                                                                                                                             | 15g                  | 76  | 14.9 |
|                                                                                                                                                                                                                                             | 30g                  | 112 | 22.0 |
|                                                                                                                                                                                                                                             | 50g                  | 37  | 7.3  |
|                                                                                                                                                                                                                                             | 100g                 | 11  | 2.2  |
|                                                                                                                                                                                                                                             | more than 100g       | 1   | .2   |
|                                                                                                                                                                                                                                             | I do not know        | 230 | 45.2 |
| <b>10. The usual thermal processing of nuts has an effect on their chemical composition and thus on their health effects, in which direction?:</b>                                                                                          | <i>Lowers</i>        | 261 | 51.3 |
|                                                                                                                                                                                                                                             | increases            | 19  | 3.7  |
|                                                                                                                                                                                                                                             | do not change        | 64  | 12.6 |
|                                                                                                                                                                                                                                             | I do not know        | 165 | 32.4 |

|                                                                                                                                               |                                    |     |      |
|-----------------------------------------------------------------------------------------------------------------------------------------------|------------------------------------|-----|------|
|                                                                                                                                               | Lowers                             | 96  | 18.9 |
| <b>11. Thermal processing of nuts impacts allergenicity, in which direction:</b>                                                              | increases                          | 39  | 7.7  |
|                                                                                                                                               | <i>do not change</i>               | 143 | 28.1 |
|                                                                                                                                               | I do not know                      | 231 | 45.4 |
|                                                                                                                                               | <i>True</i>                        | 231 | 45.4 |
| <b>12. According to its composition and health effects, peanuts can be counted as a nut, even though it belongs to the leguminous family:</b> | False                              | 40  | 7.9  |
|                                                                                                                                               | I do not know                      | 238 | 46.8 |
|                                                                                                                                               | low content of mineral substances  | 16  | 3.1  |
| <b>13. By what characteristic does the chestnut significantly differ from other types of nuts?</b>                                            | lower content of vitamin C         | 18  | 3.5  |
|                                                                                                                                               | higher energy value                | 37  | 7.3  |
|                                                                                                                                               | <i>higher carbohydrate content</i> | 121 | 23.8 |
|                                                                                                                                               | I do not know                      | 317 | 62.3 |

Correct answers are indicated in *italic*.

***Influence of passed exam (Bromatology and/or Nutrition) on Students' knowledge of nuts***

| Question                                                                                                            | Answer                                                                | N = 249    | %    |
|---------------------------------------------------------------------------------------------------------------------|-----------------------------------------------------------------------|------------|------|
| <b>1. In the dietary recommendations (nutrition pyramid), nuts are classified together with the group of foods:</b> | cereals                                                               | 76         | 30.5 |
|                                                                                                                     | milk and milk products                                                | 10         | 4.0  |
|                                                                                                                     | Fruits                                                                | 71         | 28.5 |
|                                                                                                                     | vegetables                                                            | 4          | 1.6  |
|                                                                                                                     | <i>meat and eggs</i>                                                  | 37         | 14.9 |
|                                                                                                                     | Oils                                                                  | 22         | 8.8  |
|                                                                                                                     | I do not know                                                         | 29         | 11.6 |
|                                                                                                                     | <b>2. Nuts are an important food group in the Mediterranean diet:</b> | <i>Yes</i> | 178  |
| No                                                                                                                  |                                                                       | 24         | 9.6  |
| I do not know                                                                                                       |                                                                       | 47         | 18.9 |
| <b>3. Nuts are an important food group in the DASH diet:</b>                                                        | <i>yes</i>                                                            | 127        | 51.0 |
|                                                                                                                     | no                                                                    | 18         | 7.2  |
|                                                                                                                     | I do not know                                                         | 104        | 41.8 |
| <b>4. Nuts are definitely not a source of which mineral in the diet?</b>                                            | selenium                                                              | 8          | 3.2  |
|                                                                                                                     | <i>iodine</i>                                                         | 105        | 42.2 |
|                                                                                                                     | magnesium                                                             | 21         | 8.4  |

|                                                                                                                                                                                                                          |                      |     |      |
|--------------------------------------------------------------------------------------------------------------------------------------------------------------------------------------------------------------------------|----------------------|-----|------|
|                                                                                                                                                                                                                          | iron                 | 16  | 6.4  |
|                                                                                                                                                                                                                          | zinc                 | 16  | 6.4  |
|                                                                                                                                                                                                                          | I do not know        | 83  | 33.3 |
| <b>5. Nuts are a rich source of which vitamin in the diet?</b>                                                                                                                                                           | vitamin A            | 13  | 5.2  |
|                                                                                                                                                                                                                          | vitamin C            | 9   | 3.6  |
|                                                                                                                                                                                                                          | <i>vitamin E</i>     | 141 | 56.6 |
|                                                                                                                                                                                                                          | vitamin D            | 8   | 3.2  |
|                                                                                                                                                                                                                          | vitamin B12          | 36  | 14.5 |
|                                                                                                                                                                                                                          | I do not know        | 42  | 16.9 |
| <b>6. Which of the nuts representatives is considered a good source of dietary selenium?</b>                                                                                                                             | almond               | 31  | 12.4 |
|                                                                                                                                                                                                                          | hazelnut             | 5   | 2.0  |
|                                                                                                                                                                                                                          | <i>Brazilian nut</i> | 75  | 30.1 |
|                                                                                                                                                                                                                          | walnut               | 19  | 7.6  |
|                                                                                                                                                                                                                          | cashew               | 40  | 16.1 |
|                                                                                                                                                                                                                          | I do not know        | 79  | 31.7 |
| <b>7. Nuts are primarily a source of which polyunsaturated fatty acid?</b>                                                                                                                                               | EPA                  | 35  | 14.1 |
|                                                                                                                                                                                                                          | DHA                  | 23  | 9.2  |
|                                                                                                                                                                                                                          | <i>linoleic acid</i> | 22  | 8.8  |
|                                                                                                                                                                                                                          | alpha-linolenic acid | 48  | 19.3 |
|                                                                                                                                                                                                                          | arachidonic acid     | 15  | 6.0  |
|                                                                                                                                                                                                                          | I do not know        | 106 | 42.6 |
| <b>8. Which of nuts has the highest content of saturated fatty acids and is therefore the least recommended in the diet compared to other stone fruits?</b>                                                              | peanuts              | 126 | 50.6 |
|                                                                                                                                                                                                                          | almond               | 14  | 5.6  |
|                                                                                                                                                                                                                          | walnut               | 17  | 6.8  |
|                                                                                                                                                                                                                          | hazelnut             | 3   | 1.2  |
|                                                                                                                                                                                                                          | <i>cashew</i>        | 32  | 12.9 |
|                                                                                                                                                                                                                          | I do not know        | 57  | 22.9 |
| <b>9. There is an approved health claim for walnuts that reads: "Walnuts contribute to improving the elasticity of blood vessels." The stated health statement refers to the daily intake of walnuts in which of the</b> | 10g                  | 25  | 10.0 |
|                                                                                                                                                                                                                          | 15g                  | 37  | 14.9 |
|                                                                                                                                                                                                                          | 30g                  | 66  | 26.5 |

|                                                                                                                                                    |                                                                                                    |                                   |      |
|----------------------------------------------------------------------------------------------------------------------------------------------------|----------------------------------------------------------------------------------------------------|-----------------------------------|------|
| <b>stated quantities?</b>                                                                                                                          | 50g                                                                                                | 16                                | 6.4  |
|                                                                                                                                                    | 100g                                                                                               | 6                                 | 2.4  |
|                                                                                                                                                    | more than 100g                                                                                     | 0                                 | .0   |
|                                                                                                                                                    | I do not know                                                                                      | 99                                | 39.8 |
| <b>10. The usual thermal processing of nuts has an effect on their chemical composition and thus on their health effects, in which direction::</b> | <i>lowers</i>                                                                                      | 147                               | 59.0 |
|                                                                                                                                                    | increases                                                                                          | 11                                | 4.4  |
|                                                                                                                                                    | do not change                                                                                      | 34                                | 13.7 |
|                                                                                                                                                    | I do not know                                                                                      | 57                                | 22.9 |
| <b>11. Thermal processing of nuts impacts allergenicity, in which direction:</b>                                                                   | <i>lowers</i>                                                                                      | 59                                | 23.7 |
|                                                                                                                                                    | increases                                                                                          | 21                                | 8.4  |
|                                                                                                                                                    | <i>do not change</i>                                                                               | 83                                | 33.3 |
|                                                                                                                                                    | I do not know                                                                                      | 86                                | 34.5 |
| <b>12. According to its composition and health effects, peanuts can be counted as a nut, even though it belongs to the leguminous family:</b>      | <i>true</i>                                                                                        | 129                               | 51.8 |
|                                                                                                                                                    | false                                                                                              | 24                                | 9.6  |
|                                                                                                                                                    | I do not know                                                                                      | 96                                | 38.6 |
|                                                                                                                                                    | <b>13. By what characteristic does the chestnut significantly differ from other types of nuts?</b> | low content of mineral substances | 9    |
| lower content of vitamin C                                                                                                                         |                                                                                                    | 13                                | 5.2  |
| higher energy value                                                                                                                                |                                                                                                    | 24                                | 9.6  |
| <i>higher carbohydrate content</i>                                                                                                                 |                                                                                                    | 76                                | 30.5 |
| I do not know                                                                                                                                      |                                                                                                    | 127                               | 51.0 |

*Correct answers are indicated in italic.*



***Descriptive statistics of answers on students' knowledge of nuts***

|                                             |             | Mean | SD    | Median | Min | Max |
|---------------------------------------------|-------------|------|-------|--------|-----|-----|
| All respondents (N=509)                     | Correct     | 3.90 | 2.455 | 4      | 0   | 11  |
|                                             | False       | 3.35 | 2.176 | 3      | 0   | 11  |
|                                             | Do not know | 5.75 | 3.544 | 5      | 0   | 13  |
| Passed Bromatology and/or Nutrition (N=249) | Correct     | 4.89 | 2.356 | 5      | 0   | 11  |
|                                             | False       | 4.04 | 2.031 | 4      | 0   | 11  |
|                                             | Do not know | 4.06 | 2.852 | 4      | 0   | 13  |

***Frequency of occurrence of a correct/false response per question***

| Count of answers | All respondents |       |       |       |               |       | Passed Bromatology and Nutrition |       |       |       |               |       |
|------------------|-----------------|-------|-------|-------|---------------|-------|----------------------------------|-------|-------|-------|---------------|-------|
|                  | Correct         |       | False |       | I do not know |       | Correct                          |       | False |       | I do not know |       |
| 0                | 47              | 9.2%  | 49    | 9.6%  | 25            | 4.9%  | 5                                | 2.0%  | 5     | 2.0%  | 24            | 9.6%  |
| 1                | 42              | 8.3%  | 67    | 13.2% | 32            | 6.3%  | 10                               | 4.0%  | 23    | 9.2%  | 29            | 11.6% |
| 2                | 69              | 13.6% | 72    | 14.1% | 41            | 8.1%  | 21                               | 8.4%  | 27    | 10.8% | 26            | 10.4% |
| 3                | 70              | 13.8% | 90    | 17.7% | 63            | 12.4% | 37                               | 14.9% | 45    | 18.1% | 44            | 17.7% |
| 4                | 89              | 17.5% | 92    | 18.1% | 49            | 9.6%  | 45                               | 18.1% | 60    | 24.1% | 27            | 10.8% |
| 5                | 66              | 13.0% | 51    | 10.0% | 58            | 11.4% | 40                               | 16.1% | 28    | 11.2% | 27            | 10.8% |
| 6                | 48              | 9.4%  | 45    | 8.8%  | 41            | 8.1%  | 29                               | 11.6% | 32    | 12.9% | 22            | 8.8%  |
| 7                | 37              | 7.3%  | 27    | 5.3%  | 42            | 8.3%  | 27                               | 10.8% | 18    | 7.2%  | 18            | 7.2%  |
| 8                | 22              | 4.3%  | 7     | 1.4%  | 40            | 7.9%  | 17                               | 6.8%  | 5     | 2.0%  | 9             | 3.6%  |
| 9                | 8               | 1.6%  | 6     | 1.2%  | 30            | 5.9%  | 8                                | 3.2%  | 4     | 1.6%  | 10            | 4.0%  |
| 10               | 7               | 1.4%  | 2     | 0.4%  | 29            | 5.7%  | 6                                | 2.4%  | 1     | 0.4%  | 10            | 4.0%  |
| 11               | 4               | 0.8%  | 1     | 0.2%  | 15            | 2.9%  | 4                                | 1.6%  | 1     | 0.4%  | 1             | 0.4%  |
| 12               | 0               | 0.0%  | 0     | 0.0%  | 18            | 3.5%  | 0                                | 0.0%  | 0     | 0.0%  | 1             | 0.4%  |
| 13               | 0               | 0.0%  | 0     | 0.0%  | 26            | 5.1%  | 0                                | 0.0%  | 0     | 0.0%  | 1             | 0.4%  |

***Reasons why nuts are not consumed by respondents***

|                                                                            | N = 509 | %     |
|----------------------------------------------------------------------------|---------|-------|
| Nut allergy                                                                | 5       | 0.98  |
| Inappropriate taste                                                        | 24      | 4.72  |
| I do not see the importance of nuts in the diet                            | 3       | 0.59  |
| High cost of nuts                                                          | 88      | 17.29 |
| Nuts are high in calories and contribute to weight gain                    | 9       | 1.77  |
| I believe that nuts increase blood cholesterol                             | 3       | 0.59  |
| I believe that nuts increase the risk of developing cardiovascular disease | 3       | 0.59  |
| I eat nuts                                                                 | 416     | 81.73 |

***Reasons why nuts are consumed by respondents***

|                                             | N = 509 | %     |
|---------------------------------------------|---------|-------|
| Because of the health benefits it has       | 264     | 51.87 |
| Because of the good nutritional composition | 233     | 45.78 |
| I love the taste of nuts                    | 398     | 78.19 |
| I don't consume nuts                        | 24      | 4.72  |

***Cross-comparison of reasons for consuming nuts with previously passed exams***

|                                             | Bromatology (N = 509) |                      |                                | Nutrition (N = 508) |                      |                                |
|---------------------------------------------|-----------------------|----------------------|--------------------------------|---------------------|----------------------|--------------------------------|
|                                             | Passed (N = 242)      | Not passed (N = 135) | No exam in curricula (N = 132) | Passed (N = 187)    | Not passed (N = 181) | No exam in curricula (N = 140) |
| Because of the health benefits it has       | 134                   | 72                   | 58                             | 99                  | 87                   | 77                             |
| Because of the good nutritional composition | 115                   | 65                   | 53                             | 95                  | 74                   | 64                             |
| I love the taste of nuts                    | 192                   | 103                  | 103                            | 149                 | 135                  | 114                            |
| I don't consume nuts                        | 10                    | 4                    | 10                             | 6                   | 12                   | 6                              |

***The type of nuts that is most common consumed in the diet.***

|                      | N = 509 | %    |
|----------------------|---------|------|
| Walnut               | 76      | 14.9 |
| Hazelnut             | 80      | 15.7 |
| Almond               | 154     | 30.3 |
| Cashew               | 18      | 3.5  |
| Brazilian nut        | 3       | 0.6  |
| Pistachios           | 13      | 2.5  |
| Peanuts              | 153     | 30.1 |
| Tame chestnut        | 3       | 0.6  |
| I don't consume nuts | 9       | 1.8  |

***Frequency of use of nuts in diet***

|                          | N = 509 | %    |
|--------------------------|---------|------|
| More than 5 times a week | 43      | 8.4  |
| 2-4 times a week         | 200     | 39.3 |
| once a week              | 142     | 27.9 |
| 3 times a month          | 76      | 14.9 |
| Less than once a month   | 41      | 8.1  |
| I don't consume nuts     | 7       | 1.4  |

***Usual portion size of nuts in the diet***

|                       | N = 509 | %    |
|-----------------------|---------|------|
| 10-30g                | 185     | 36.3 |
| 30-60g                | 183     | 36.0 |
| 60-90g                | 83      | 16.3 |
| 90-120g               | 39      | 7.7  |
| 120-150g              | 8       | 1.6  |
| More than 150g        | 3       | 0.6  |
| I do not consume nuts | 8       | 1.6  |

***The usual form of nuts consumption***

|                                      | N = 509 | %    |
|--------------------------------------|---------|------|
| Raw                                  | 269     | 52.9 |
| Baked                                | 205     | 40.3 |
| Fried in oil                         | 12      | 2.4  |
| In the form of paste, butter         | 13      | 2.6  |
| I do not consume nuts                | 9       | 1.8  |
| Other: stayed in water for some time | 1       | 0.2  |

***Type of nuts procurement***

|                                                   | N = 509 | %    |
|---------------------------------------------------|---------|------|
| Industrially packaged                             | 101     | 19.8 |
| In bulk goods stores ("bio shop"), by measure     | 326     | 64.0 |
| On the market, by measure                         | 62      | 12.2 |
| I do not consume nuts                             | 8       | 1.6  |
| Other (independent cultivation, multiple answers) | 12      | 2.4  |

***The association of the need for additional information with attitudes regarding the health effects and nutritional value of nuts***

| 1. Nuts represent a group of foods of exceptional nutritional value.  |         |     |      |      |      |      |        |         |
|-----------------------------------------------------------------------|---------|-----|------|------|------|------|--------|---------|
| Need for additional information                                       |         | 1   | 2    | 3    | 4    | 5    | Stat.  | p-value |
| Yes                                                                   | N = 380 | 1   | 8    | 42   | 114  | 215  | 33.947 | <0.001* |
|                                                                       | %       | 0.3 | 2.1  | 11.1 | 30.0 | 56.6 |        |         |
| No                                                                    | N = 49  | 2   | 3    | 12   | 11   | 21   |        |         |
|                                                                       | %       | 4.1 | 6.1  | 24.5 | 22.4 | 42.9 |        |         |
| I do not know                                                         | N = 80  | 0   | 3    | 21   | 25   | 31   |        |         |
|                                                                       | %       | 0.0 | 3.8  | 26.3 | 31.3 | 38.8 |        |         |
| 2. Regular consumption of nuts can have beneficial effects on health. |         |     |      |      |      |      |        |         |
| Need for additional information                                       |         | 1   | 2    | 3    | 4    | 5    | Stat.  | p-value |
| Yes                                                                   | N = 380 | 0   | 5    | 36   | 112  | 227  | 51.763 | <0.001* |
|                                                                       | %       | 0.0 | 1.3  | 9.5  | 29.5 | 59.7 |        |         |
| No                                                                    | N = 49  | 1   | 7    | 13   | 8    | 20   |        |         |
|                                                                       | %       | 2.0 | 14.3 | 26.5 | 16.3 | 40.8 |        |         |
| I do not know                                                         | N = 80  | 0   | 4    | 13   | 24   | 39   |        |         |

|                                                                                                                     |         |     |      |      |      |      |        |         |
|---------------------------------------------------------------------------------------------------------------------|---------|-----|------|------|------|------|--------|---------|
|                                                                                                                     | %       | 0.0 | 5.0  | 16.3 | 30.0 | 48.8 |        |         |
| 3. Consuming nuts contributes to the maintenance of normal lipid status.                                            |         |     |      |      |      |      |        |         |
| Need for additional information                                                                                     |         | 1   | 2    | 3    | 4    | 5    | Stat.  | p-value |
| Yes                                                                                                                 | N = 379 | 2   | 12   | 99   | 115  | 151  | 31.646 | <0.001* |
|                                                                                                                     | %       | .5  | 3.2  | 26.1 | 30.3 | 39.8 |        |         |
| No                                                                                                                  | N = 49  | 4   | 4    | 17   | 8    | 16   |        |         |
|                                                                                                                     | %       | 8.2 | 8.2  | 34.7 | 16.3 | 32.7 |        |         |
| I do not know                                                                                                       | N = 80  | 0   | 5    | 25   | 22   | 28   |        |         |
|                                                                                                                     | %       | 0.0 | 6.3  | 31.3 | 27.5 | 35.0 |        |         |
| 4. Regular and moderate consumption of nuts contributes to reducing the risk of developing cardiovascular diseases. |         |     |      |      |      |      |        |         |
| Need for additional information                                                                                     |         | 1   | 2    | 3    | 4    | 5    | Stat.  | p-value |
| Yes                                                                                                                 | N = 380 | 1   | 15   | 84   | 128  | 152  | 18.493 | 0.018*  |
|                                                                                                                     | %       | .3  | 3.9  | 22.1 | 33.7 | 40.0 |        |         |
| No                                                                                                                  | N = 49  | 2   | 5    | 16   | 11   | 15   |        |         |
|                                                                                                                     | %       | 4.1 | 10.2 | 32.7 | 22.4 | 30.6 |        |         |
| I do not know                                                                                                       | N = 80  | 1   | 2    | 19   | 30   | 28   |        |         |
|                                                                                                                     | %       | 1.3 | 2.5  | 23.8 | 37.5 | 35.0 |        |         |
| 5. Regular and moderate consumption of nuts contributes to reducing the risk of developing diabetes.                |         |     |      |      |      |      |        |         |
| Need for additional information                                                                                     |         | 1   | 2    | 3    | 4    | 5    | Stat.  | p-value |
| Yes                                                                                                                 | N = 380 | 5   | 36   | 115  | 115  | 109  | 13.583 | 0.093   |
|                                                                                                                     | %       | 1.3 | 9.5  | 30.3 | 30.3 | 28.7 |        |         |
| No                                                                                                                  | N = 49  | 4   | 7    | 15   | 11   | 12   |        |         |
|                                                                                                                     | %       | 8.2 | 14.3 | 30.6 | 22.4 | 24.5 |        |         |
| I do not know                                                                                                       | N = 80  | 1   | 9    | 25   | 26   | 19   |        |         |
|                                                                                                                     | %       | 1.3 | 11.3 | 31.3 | 32.5 | 23.8 |        |         |
| 6. Regular and moderate consumption of nuts contributes to reducing the risk of cancer.                             |         |     |      |      |      |      |        |         |

| Need for additional information |         | 1    | 2    | 3    | 4    | 5    | Stat.  | p-value |
|---------------------------------|---------|------|------|------|------|------|--------|---------|
| Yes                             | N = 380 | 10   | 59   | 134  | 96   | 81   | 14.628 | 0.067   |
|                                 | %       | 2.6  | 15.5 | 35.3 | 25.3 | 21.3 |        |         |
| No                              | N = 49  | 5    | 13   | 17   | 5    | 9    |        |         |
|                                 | %       | 10.2 | 26.5 | 34.7 | 10.2 | 18.4 |        |         |
| I do not know                   | N = 80  | 4    | 13   | 28   | 19   | 16   |        |         |
|                                 | %       | 5.0  | 16.3 | 35.0 | 23.8 | 20.0 |        |         |

7. Regular and moderate consumption of nuts contributes to an increase in total cholesterol.

| Need for additional information |         | 1    | 2    | 3    | 4    | 5    | Stat. | p-value |
|---------------------------------|---------|------|------|------|------|------|-------|---------|
| Yes                             | N = 380 | 52   | 107  | 121  | 63   | 37   | 5.933 | 0.655   |
|                                 | %       | 13.7 | 28.2 | 31.8 | 16.6 | 9.7  |       |         |
| No                              | N = 49  | 8    | 13   | 20   | 5    | 3    |       |         |
|                                 | %       | 16.3 | 26.5 | 40.8 | 10.2 | 6.1  |       |         |
| I do not know                   | N = 80  | 7    | 20   | 32   | 12   | 9    |       |         |
|                                 | %       | 8.8  | 25.0 | 40.0 | 15.0 | 11.3 |       |         |

8. Consuming nuts several times a week contributes to an increase in body weight.

| Need for additional information |         | 1    | 2    | 3    | 4    | 5   | Stat. | p-value |
|---------------------------------|---------|------|------|------|------|-----|-------|---------|
| Yes                             | N = 380 | 90   | 95   | 105  | 67   | 23  | 2.932 | 0.939   |
|                                 | %       | 23.7 | 25.0 | 27.6 | 17.6 | 6.1 |       |         |
| No                              | N = 49  | 11   | 10   | 15   | 9    | 4   |       |         |
|                                 | %       | 22.4 | 20.4 | 30.6 | 18.4 | 8.2 |       |         |
| I do not know                   | N = 80  | 19   | 18   | 28   | 11   | 4   |       |         |
|                                 | %       | 23.8 | 22.5 | 35.0 | 13.8 | 5.0 |       |         |

9. Regular consumption of nuts contributes to the reduction of inflammation.

| Need for additional information |         | 1  | 2  | 3   | 4  | 5  | Stat.  | p-value |
|---------------------------------|---------|----|----|-----|----|----|--------|---------|
| Yes                             | N = 379 | 15 | 53 | 182 | 83 | 46 | 11.686 | 0.166   |

|                                                                                                   |         |      |      |      |      |      |        |         |
|---------------------------------------------------------------------------------------------------|---------|------|------|------|------|------|--------|---------|
|                                                                                                   | %       | 4.0  | 14.0 | 48.0 | 21.9 | 12.1 |        |         |
| No                                                                                                | N = 49  | 5    | 9    | 23   | 6    | 6    |        |         |
|                                                                                                   | %       | 10.2 | 18.4 | 46.9 | 12.2 | 12.2 |        |         |
| I do not know                                                                                     | N = 80  | 4    | 17   | 42   | 12   | 5    |        |         |
|                                                                                                   | %       | 5.0  | 21.3 | 52.5 | 15.0 | 6.3  |        |         |
| 10. Regular consumption of nuts contributes to the maintenance of normal endothelial function.    |         |      |      |      |      |      |        |         |
| Need for additional information                                                                   |         | 1    | 2    | 3    | 4    | 5    | Stat.  | p-value |
| Yes                                                                                               | N = 379 | 6    | 42   | 152  | 119  | 60   | 21.531 | 0.006*  |
|                                                                                                   | %       | 1.6  | 11.1 | 40.1 | 31.4 | 15.8 |        |         |
| No                                                                                                | N = 49  | 4    | 7    | 25   | 7    | 6    |        |         |
|                                                                                                   | %       | 8.2  | 14.3 | 51.0 | 14.3 | 12.2 |        |         |
| I do not know                                                                                     | N = 80  | 2    | 3    | 42   | 25   | 8    |        |         |
|                                                                                                   | %       | 2.5  | 3.8  | 52.5 | 31.3 | 10.0 |        |         |
| 11. Regular consumption of nuts can have a beneficial effect on the oxidative status in the body. |         |      |      |      |      |      |        |         |
| Need for additional information                                                                   |         | 1    | 2    | 3    | 4    | 5    | Stat.  | p-value |
| Yes                                                                                               | N = 379 | 0    | 34   | 108  | 132  | 105  | 50.214 | <0.001* |
|                                                                                                   | %       | 0.0  | 9.0  | 28.5 | 34.8 | 27.7 |        |         |
| No                                                                                                | N = 49  | 4    | 6    | 20   | 12   | 7    |        |         |
|                                                                                                   | %       | 8.2  | 12.2 | 40.8 | 24.5 | 14.3 |        |         |
| I do not know                                                                                     | N = 80  | 0    | 4    | 28   | 34   | 14   |        |         |
|                                                                                                   | %       | 0.0  | 5.0  | 35.0 | 42.5 | 17.5 |        |         |
| 12. It is important to know that nuts represent a source of protein in the diet.                  |         |      |      |      |      |      |        |         |
| Need for additional information                                                                   |         | 1    | 2    | 3    | 4    | 5    | Stat.  | p-value |
| Yes                                                                                               | N = 380 | 22   | 39   | 71   | 108  | 140  | 13.337 | 0.101   |
|                                                                                                   | %       | 5.8  | 10.3 | 18.7 | 28.4 | 36.8 |        |         |
| No                                                                                                | N = 49  | 5    | 11   | 10   | 7    | 16   |        |         |
|                                                                                                   | %       | 10.2 | 22.4 | 20.4 | 14.3 | 32.7 |        |         |



|                                                                                                                |         |      |      |      |      |      |        |         |
|----------------------------------------------------------------------------------------------------------------|---------|------|------|------|------|------|--------|---------|
| I do not know                                                                                                  | N = 80  | 6    | 7    | 20   | 23   | 24   |        |         |
|                                                                                                                | %       | 7.5  | 8.8  | 25.0 | 28.8 | 30.0 |        |         |
| 13. Nuts should be consumed regularly because it is a good source of unsaturated (healthy) fats in the diet.   |         |      |      |      |      |      |        |         |
| Need for additional information                                                                                |         | 1    | 2    | 3    | 4    | 5    | Stat.  | p-value |
| Yes                                                                                                            | N = 380 | 1    | 13   | 57   | 102  | 207  | 28.905 | <0.001* |
|                                                                                                                | %       | 0.3  | 3.4  | 15.0 | 26.8 | 54.5 |        |         |
| No                                                                                                             | N = 49  | 2    | 7    | 12   | 9    | 19   |        |         |
|                                                                                                                | %       | 4.1  | 14.3 | 24.5 | 18.4 | 38.8 |        |         |
| I do not know                                                                                                  | N = 80  | 0    | 5    | 16   | 22   | 37   |        |         |
|                                                                                                                | %       | 0.0  | 6.3  | 20.0 | 27.5 | 46.3 |        |         |
| 14. Nuts should be consumed regularly because it is a good source of essential fatty acids in the diet.        |         |      |      |      |      |      |        |         |
| Need for additional information                                                                                |         | 1    | 2    | 3    | 4    | 5    | Stat.  | p-value |
| Yes                                                                                                            | N = 380 | 4    | 12   | 84   | 105  | 175  | 26.023 | 0.001   |
|                                                                                                                | %       | 1.1  | 3.2  | 22.1 | 27.6 | 46.1 |        |         |
| No                                                                                                             | N = 49  | 4    | 5    | 14   | 10   | 16   |        |         |
|                                                                                                                | %       | 8.2  | 10.2 | 28.6 | 20.4 | 32.7 |        |         |
| I do not know                                                                                                  | N = 80  | 1    | 6    | 21   | 26   | 26   |        |         |
|                                                                                                                | %       | 1.3  | 7.5  | 26.3 | 32.5 | 32.5 |        |         |
| 15. Nuts can contribute to the preservation and improvement of health as a significant source of antioxidants. |         |      |      |      |      |      |        |         |
| Need for additional information                                                                                |         | 1    | 2    | 3    | 4    | 5    | Stat.  | p-value |
| Yes                                                                                                            | N = 379 | 4    | 18   | 69   | 131  | 157  | 32.191 | <0.001* |
|                                                                                                                | %       | 1.1  | 4.7  | 18.2 | 34.6 | 41.4 |        |         |
| No                                                                                                             | N = 49  | 5    | 3    | 16   | 6    | 19   |        |         |
|                                                                                                                | %       | 10.2 | 6.1  | 32.7 | 12.2 | 38.8 |        |         |
| I do not know                                                                                                  | N = 80  | 2    | 4    | 22   | 28   | 24   |        |         |
|                                                                                                                | %       | 2.5  | 5.0  | 27.5 | 35.0 | 30.0 |        |         |
| 16. Almonds are a good nutritional source of iron in the diet.                                                 |         |      |      |      |      |      |        |         |

| Need for additional information |         | 1    | 2    | 3    | 4    | 5    | Stat. | p-value |
|---------------------------------|---------|------|------|------|------|------|-------|---------|
| Yes                             | N = 380 | 19   | 52   | 117  | 103  | 89   | 9.149 | 0.330   |
|                                 | %       | 5.0  | 13.7 | 30.8 | 27.1 | 23.4 |       |         |
| No                              | N = 49  | 5    | 7    | 17   | 10   | 10   |       |         |
|                                 | %       | 10.2 | 14.3 | 34.7 | 20.4 | 20.4 |       |         |
| I do not know                   | N = 80  | 9    | 6    | 29   | 19   | 17   |       |         |
|                                 | %       | 11.3 | 7.5  | 36.3 | 23.8 | 21.3 |       |         |

17. Nuts should be recommended as a healthy snack in the diet.

| Need for additional information |         | 1   | 2    | 3    | 4    | 5    | Stat.  | p-value |
|---------------------------------|---------|-----|------|------|------|------|--------|---------|
| Yes                             | N = 380 | 4   | 8    | 35   | 93   | 240  | 28.024 | <0.001* |
|                                 | %       | 1.1 | 2.1  | 9.2  | 24.5 | 63.2 |        |         |
| No                              | N = 49  | 2   | 5    | 11   | 11   | 20   |        |         |
|                                 | %       | 4.1 | 10.2 | 22.4 | 22.4 | 40.8 |        |         |
| I do not know                   | N = 80  | 1   | 4    | 13   | 25   | 37   |        |         |
|                                 | %       | 1.3 | 5.0  | 16.3 | 31.3 | 46.3 |        |         |

18. The general population is not sufficiently informed about the health benefits of nuts.

| Need for additional information |         | 1   | 2    | 3    | 4    | 5    | Stat.  | p-value |
|---------------------------------|---------|-----|------|------|------|------|--------|---------|
| Yes                             | N = 380 | 3   | 10   | 44   | 76   | 247  | 37.259 | <0.001* |
|                                 | %       | 0.8 | 2.6  | 11.6 | 20.0 | 65.0 |        |         |
| No                              | N = 49  | 4   | 5    | 11   | 6    | 23   |        |         |
|                                 | %       | 8.2 | 10.2 | 22.4 | 12.2 | 46.9 |        |         |
| I do not know                   | N = 80  | 2   | 3    | 17   | 22   | 36   |        |         |
|                                 | %       | 2.5 | 3.8  | 21.3 | 27.5 | 45.0 |        |         |

19. One of the main barriers to the regular consumption of nuts is the high price.

| Need for additional information |         | 1 | 2  | 3  | 4   | 5   | Stat.  | p-value |
|---------------------------------|---------|---|----|----|-----|-----|--------|---------|
| Yes                             | N = 380 | 9 | 21 | 60 | 117 | 173 | 20.073 | 0.010*  |

|                                                                                                                   |         |      |      |      |      |      |        |         |
|-------------------------------------------------------------------------------------------------------------------|---------|------|------|------|------|------|--------|---------|
|                                                                                                                   | %       | 2.4  | 5.5  | 15.8 | 30.8 | 45.5 |        |         |
| No                                                                                                                | N = 49  | 4    | 7    | 13   | 9    | 16   |        |         |
|                                                                                                                   | %       | 8.2  | 14.3 | 26.5 | 18.4 | 32.7 |        |         |
| I do not know                                                                                                     | N = 80  | 0    | 6    | 14   | 24   | 36   |        |         |
|                                                                                                                   | %       | 0.0  | 7.5  | 17.5 | 30.0 | 45.0 |        |         |
| 20. I rarely consume nuts for fear of gaining weight.                                                             |         |      |      |      |      |      |        |         |
| Need for additional information                                                                                   |         | 1    | 2    | 3    | 4    | 5    | Stat.  | p-value |
| Yes                                                                                                               | N = 380 | 220  | 58   | 52   | 30   | 20   | 8.128  | 0.421   |
|                                                                                                                   | %       | 57.9 | 15.3 | 13.7 | 7.9  | 5.3  |        |         |
| No                                                                                                                | N = 49  | 28   | 5    | 12   | 2    | 2    |        |         |
|                                                                                                                   | %       | 57.1 | 10.2 | 24.5 | 4.1  | 4.1  |        |         |
| I do not know                                                                                                     | N = 80  | 45   | 8    | 17   | 7    | 3    |        |         |
|                                                                                                                   | %       | 56.3 | 10.0 | 21.3 | 8.8  | 3.8  |        |         |
| 21. I would try to consume nuts more often if recommended by a doctor, nutritionist or other health professional. |         |      |      |      |      |      |        |         |
| Need for additional information                                                                                   |         | 1    | 2    | 3    | 4    | 5    | Stat.  | p-value |
| Yes                                                                                                               | N = 380 | 44   | 40   | 84   | 82   | 130  | 27.393 | 0.001*  |
|                                                                                                                   | %       | 11.6 | 10.5 | 22.1 | 21.6 | 34.2 |        |         |
| No                                                                                                                | N = 49  | 17   | 4    | 12   | 7    | 9    |        |         |
|                                                                                                                   | %       | 34.7 | 8.2  | 24.5 | 14.3 | 18.4 |        |         |
| I do not know                                                                                                     | N = 80  | 9    | 12   | 25   | 14   | 20   |        |         |
|                                                                                                                   | %       | 11.3 | 15.0 | 31.3 | 17.5 | 25.0 |        |         |
| 22. Nuts are one of the most common causes of allergic reactions to food.                                         |         |      |      |      |      |      |        |         |
| Need for additional information                                                                                   |         | 1    | 2    | 3    | 4    | 5    | Stat.  | p-value |
| Yes                                                                                                               | N = 380 | 20   | 41   | 87   | 121  | 111  | 11.425 | 0.179   |
|                                                                                                                   | %       | 5.3  | 10.8 | 22.9 | 31.8 | 29.2 |        |         |
| No                                                                                                                | N = 49  | 6    | 8    | 14   | 13   | 8    |        |         |

|               |        |      |      |      |      |      |  |  |
|---------------|--------|------|------|------|------|------|--|--|
|               | %      | 12.2 | 16.3 | 28.6 | 26.5 | 16.3 |  |  |
| I do not know | N = 80 | 8    | 7    | 16   | 22   | 27   |  |  |
|               | %      | 10.0 | 8.8  | 20.0 | 27.5 | 33.8 |  |  |

***The association between the need for additional information and students' knowledge about nuts***

| Question                                                                                                            | Answer                 | Yes<br>(N=380) |      | No<br>(N=49) |      | I don't<br>know<br>(N=80) |      | Test   |       |
|---------------------------------------------------------------------------------------------------------------------|------------------------|----------------|------|--------------|------|---------------------------|------|--------|-------|
|                                                                                                                     |                        | N              | %    | N            | %    | N                         | %    | Stat.  | p     |
| <b>1. In the dietary recommendations (nutrition pyramid), nuts are classified together with the group of foods:</b> | Cereals                | 105            | 27.6 | 13           | 26.5 | 23                        | 28.8 | 19.406 | 0.079 |
|                                                                                                                     | milk and milk products | 12             | 3.2  | 2            | 4.1  | 0                         | 0.0  |        |       |
|                                                                                                                     | Fruits                 | 88             | 23.2 | 5            | 10.2 | 14                        | 17.5 |        |       |
|                                                                                                                     | Vegetables             | 3              | 0.8  | 0            | 0.0  | 1                         | 1.3  |        |       |
|                                                                                                                     | <i>meat and eggs</i>   | 55             | 14.5 | 8            | 16.3 | 4                         | 5.0  |        |       |
|                                                                                                                     | Oils                   | 26             | 6.8  | 6            | 12.2 | 10                        | 12.5 |        |       |
|                                                                                                                     | I do not know          | 91             | 23.9 | 15           | 30.6 | 28                        | 35.0 |        |       |
| <b>2. Nuts are an important food group in the Mediterranean diet:</b>                                               | <i>Yes</i>             | 238            | 62.6 | 25           | 51.0 | 37                        | 46.3 | 10.638 | 0.031 |
|                                                                                                                     | No                     | 27             | 7.1  | 3            | 6.1  | 5                         | 6.3  |        |       |
|                                                                                                                     | I do not know          | 115            | 30.3 | 21           | 42.9 | 38                        | 47.5 |        |       |
| <b>3. Nuts are an important food group in the DASH diet:</b>                                                        | <i>Yes</i>             | 119            | 31.3 | 11           | 22.4 | 20                        | 25.0 | 3.661  | 0.454 |
|                                                                                                                     | No                     | 13             | 3.4  | 3            | 6.1  | 2                         | 2.5  |        |       |
|                                                                                                                     | I do not know          | 248            | 65.3 | 35           | 71.4 | 58                        | 72.5 |        |       |
| <b>4. Nuts are definitely not a source of which mineral in the diet?</b>                                            | Selenium               | 7              | 1.8  | 2            | 4.1  | 1                         | 1.3  | 13.059 | 0.220 |
|                                                                                                                     | <i>Iodine</i>          | 144            | 37.9 | 13           | 26.5 | 24                        | 30.0 |        |       |
|                                                                                                                     | Magnesium              | 21             | 5.5  | 1            | 2.0  | 9                         | 11.3 |        |       |
|                                                                                                                     | Iron                   | 22             | 5.8  | 2            | 4.1  | 7                         | 8.8  |        |       |
|                                                                                                                     | Zinc                   | 23             | 6.1  | 2            | 4.1  | 5                         | 6.3  |        |       |

|                                                                                                                                                             |                      |     |      |    |      |    |      |        |       |
|-------------------------------------------------------------------------------------------------------------------------------------------------------------|----------------------|-----|------|----|------|----|------|--------|-------|
|                                                                                                                                                             | I do not know        | 163 | 42.9 | 29 | 59.2 | 34 | 42.5 |        |       |
| <b>5. Nuts are a rich source of which vitamin in the diet?</b>                                                                                              | vitamin A            | 18  | 4.7  | 3  | 6.1  | 3  | 3.8  | 11.678 | 0.307 |
|                                                                                                                                                             | vitamin C            | 7   | 1.8  | 3  | 6.1  | 4  | 5.0  |        |       |
|                                                                                                                                                             | <i>vitamin E</i>     | 159 | 41.8 | 15 | 30.6 | 26 | 32.5 |        |       |
|                                                                                                                                                             | vitamin D            | 12  | 3.2  | 2  | 4.1  | 5  | 6.3  |        |       |
|                                                                                                                                                             | vitamin B12          | 68  | 17.9 | 6  | 12.2 | 14 | 17.5 |        |       |
|                                                                                                                                                             | I do not know        | 116 | 30.5 | 20 | 40.8 | 28 | 35.0 |        |       |
| <b>6. Which of the nuts representatives is considered a good source of dietary selenium?</b>                                                                | Almond               | 37  | 9.7  | 3  | 6.1  | 12 | 15.0 | 9.231  | 0.510 |
|                                                                                                                                                             | Hazelnut             | 4   | 1.1  | 1  | 2.0  | 3  | 3.8  |        |       |
|                                                                                                                                                             | <i>Brazilian nut</i> | 97  | 25.5 | 11 | 22.4 | 13 | 16.3 |        |       |
|                                                                                                                                                             | Walnut               | 21  | 5.5  | 2  | 4.1  | 3  | 3.8  |        |       |
|                                                                                                                                                             | Cashew               | 51  | 13.4 | 7  | 14.3 | 11 | 13.8 |        |       |
|                                                                                                                                                             | I do not know        | 170 | 44.7 | 25 | 51.0 | 38 | 47.5 |        |       |
| <b>7. Nuts are primarily a source of which polyunsaturated fatty acid?</b>                                                                                  | EPA                  | 25  | 6.6  | 5  | 10.2 | 9  | 11.3 | 7.573  | 0.670 |
|                                                                                                                                                             | DHA                  | 24  | 6.3  | 2  | 4.1  | 2  | 2.5  |        |       |
|                                                                                                                                                             | <i>linoleic acid</i> | 34  | 8.9  | 3  | 6.1  | 5  | 6.3  |        |       |
|                                                                                                                                                             | alpha-linolenic acid | 48  | 12.6 | 7  | 14.3 | 8  | 10.0 |        |       |
|                                                                                                                                                             | arachidonic acid     | 29  | 7.6  | 2  | 4.1  | 4  | 5.0  |        |       |
|                                                                                                                                                             | I do not know        | 220 | 57.9 | 30 | 61.2 | 52 | 65.0 |        |       |
| <b>8. Which of nuts has the highest content of saturated fatty acids and is therefore the least recommended in the diet compared to other stone fruits?</b> | Peanuts              | 172 | 45.3 | 15 | 30.6 | 32 | 40.0 | 14.762 | 0.141 |
|                                                                                                                                                             | Almond               | 20  | 5.3  | 2  | 4.1  | 8  | 10.0 |        |       |
|                                                                                                                                                             | Walnut               | 14  | 3.7  | 4  | 8.2  | 5  | 6.3  |        |       |
|                                                                                                                                                             | Hazelnut             | 7   | 1.8  | 0  | 0.0  | 1  | 1.3  |        |       |
|                                                                                                                                                             | <i>Cashew</i>        | 43  | 11.3 | 3  | 6.1  | 10 | 12.5 |        |       |
|                                                                                                                                                             | I do not know        | 124 | 32.6 | 25 | 51.0 | 24 | 30.0 |        |       |
| <b>9. There is an approved health claim for walnuts that reads: "Walnuts contribute to improving the elasticity of blood vessels." The stated</b>           | 10g                  | 33  | 8.7  | 4  | 8.2  | 5  | 6.3  | 4.160  | 0.980 |
|                                                                                                                                                             | 15g                  | 58  | 15.3 | 7  | 14.3 | 11 | 13.8 |        |       |
|                                                                                                                                                             | 30g                  | 85  | 22.4 | 11 | 22.4 | 16 | 20.0 |        |       |
|                                                                                                                                                             | 50g                  | 30  | 7.9  | 3  | 6.1  | 4  | 5.0  |        |       |
|                                                                                                                                                             | 100g                 | 7   | 1.8  | 2  | 4.1  | 2  | 2.5  |        |       |

|                                                                                                                                                     |                                    |     |      |    |      |    |      |        |       |
|-----------------------------------------------------------------------------------------------------------------------------------------------------|------------------------------------|-----|------|----|------|----|------|--------|-------|
| <b>health statement refers to the daily intake of walnuts in which of the stated quantities?</b>                                                    | more than 100g                     | 1   | 0.3  | 0  | 0.0  | 0  | 0.0  |        |       |
|                                                                                                                                                     | I do not know                      | 166 | 43.7 | 22 | 44.9 | 42 | 52.5 |        |       |
| <b>10. The usual thermal processing of nuts has an effect on their chemical composition and thus on their health effects, in which direction: :</b> | <i>Lowers</i>                      | 209 | 55.0 | 17 | 34.7 | 35 | 43.8 | 11.891 | 0.064 |
|                                                                                                                                                     | increases                          | 13  | 3.4  | 4  | 8.2  | 2  | 2.5  |        |       |
|                                                                                                                                                     | do not change                      | 46  | 12.1 | 7  | 14.3 | 11 | 13.8 |        |       |
|                                                                                                                                                     | I do not know                      | 112 | 29.5 | 21 | 42.9 | 32 | 40.0 |        |       |
| <b>11. Thermal processing of nuts impacts allergenicity, in which direction:</b>                                                                    | Lowers                             | 69  | 18.2 | 9  | 18.4 | 18 | 22.5 | 2.560  | 0.862 |
|                                                                                                                                                     | increases                          | 31  | 8.2  | 3  | 6.1  | 5  | 6.3  |        |       |
|                                                                                                                                                     | <i>do not change</i>               | 109 | 28.7 | 11 | 22.4 | 23 | 28.8 |        |       |
|                                                                                                                                                     | I do not know                      | 171 | 45.0 | 26 | 53.1 | 34 | 42.5 |        |       |
| <b>12. According to its composition and health effects, peanuts can be counted as a nut, even though it belongs to the leguminous family:</b>       | <i>True</i>                        | 180 | 47.4 | 16 | 32.7 | 35 | 43.8 | 6.422  | 0.170 |
|                                                                                                                                                     | False                              | 25  | 6.6  | 7  | 14.3 | 8  | 10.0 |        |       |
|                                                                                                                                                     | I do not know                      | 175 | 46.1 | 26 | 53.1 | 37 | 46.3 |        |       |
| <b>13. By what characteristic does the chestnut significantly differ from other types of nuts?</b>                                                  | low content of mineral substances  | 13  | 3.4  | 1  | 2.0  | 2  | 2.5  | 4.198  | 0.839 |
|                                                                                                                                                     | lower content of vitamin C         | 11  | 2.9  | 3  | 6.1  | 4  | 5.0  |        |       |
|                                                                                                                                                     | higher energy value                | 26  | 6.8  | 4  | 8.2  | 7  | 8.8  |        |       |
|                                                                                                                                                     | <i>higher carbohydrate content</i> | 96  | 25.3 | 9  | 18.4 | 16 | 20.0 |        |       |
|                                                                                                                                                     | I do not know                      | 234 | 61.6 | 32 | 65.3 | 51 | 63.8 |        |       |

*Correct answers are indicated in italic.*

***The influence of passing the nutrition-related exam (Bromatology) on attitudes regarding the health effects and nutritional importance of nuts***

| 1. Nuts represent a group of foods of exceptional nutritional value.                                                |         |     |     |      |      |      |                     |         |
|---------------------------------------------------------------------------------------------------------------------|---------|-----|-----|------|------|------|---------------------|---------|
|                                                                                                                     |         | 1   | 2   | 3    | 4    | 5    | Stat.               | p-value |
| Passed                                                                                                              | N = 242 | 1   | 5   | 34   | 69   | 133  | 8.330 <sup>f</sup>  | 0.366   |
|                                                                                                                     | %       | .4  | 2.1 | 14.0 | 28.5 | 55.0 |                     |         |
| Not passed                                                                                                          | N = 136 | 1   | 5   | 16   | 49   | 65   |                     |         |
|                                                                                                                     | %       | .7  | 3.7 | 11.8 | 36.0 | 47.8 |                     |         |
| No exam in curricula                                                                                                | N = 131 | 1   | 4   | 25   | 32   | 69   |                     |         |
|                                                                                                                     | %       | .8  | 3.1 | 19.1 | 24.4 | 52.7 |                     |         |
| 2. Regular consumption of nuts can have beneficial effects on health.                                               |         |     |     |      |      |      |                     |         |
|                                                                                                                     |         | 1   | 2   | 3    | 4    | 5    | Stat.               | p-value |
| Passed                                                                                                              | N =242  | 0   | 4   | 18   | 68   | 152  | 22.914 <sup>f</sup> | 0.001*  |
|                                                                                                                     | %       | 0.0 | 1.7 | 7.4  | 28.1 | 62.8 |                     |         |
| Not passed                                                                                                          | N =136  | 0   | 4   | 19   | 37   | 76   |                     |         |
|                                                                                                                     | %       | 0.0 | 2.9 | 14.0 | 27.2 | 55.9 |                     |         |
| No exam in curricula                                                                                                | N =131  | 1   | 8   | 25   | 39   | 58   |                     |         |
|                                                                                                                     | %       | .8  | 6.1 | 19.1 | 29.8 | 44.3 |                     |         |
| 3. Consuming nuts contributes to the maintenance of normal lipid status.                                            |         |     |     |      |      |      |                     |         |
|                                                                                                                     |         | 1   | 2   | 3    | 4    | 5    | Stat.               | p-value |
| Passed                                                                                                              | N =242  | 1   | 6   | 54   | 78   | 103  | 20.182              | 0.010*  |
|                                                                                                                     | %       | .4  | 2.5 | 22.3 | 32.2 | 42.6 |                     |         |
| Not passed                                                                                                          | N =135  | 3   | 7   | 36   | 38   | 51   |                     |         |
|                                                                                                                     | %       | 2.2 | 5.2 | 26.7 | 28.1 | 37.8 |                     |         |
| No exam in curricula                                                                                                | N =131  | 2   | 8   | 51   | 29   | 41   |                     |         |
|                                                                                                                     | %       | 1.5 | 6.1 | 38.9 | 22.1 | 31.3 |                     |         |
| 4. Regular and moderate consumption of nuts contributes to reducing the risk of developing cardiovascular diseases. |         |     |     |      |      |      |                     |         |
|                                                                                                                     |         | 1   | 2   | 3    | 4    | 5    | Stat.               | p-value |
| Passed                                                                                                              | N =242  | 0   | 9   | 48   | 85   | 100  | 18.965              | 0.015*  |
|                                                                                                                     | %       | 0.0 | 3.7 | 19.8 | 35.1 | 41.3 |                     |         |
| Not passed                                                                                                          | N =136  | 0   | 5   | 34   | 42   | 55   |                     |         |

|                                                                                                      |        |      |      |      |      |      |        |         |
|------------------------------------------------------------------------------------------------------|--------|------|------|------|------|------|--------|---------|
|                                                                                                      | %      | 0.0  | 3.7  | 25.0 | 30.9 | 40.4 |        |         |
| No exam in curricula                                                                                 | N =131 | 4    | 8    | 37   | 42   | 40   |        |         |
|                                                                                                      | %      | 3.1  | 6.1  | 28.2 | 32.1 | 30.5 |        |         |
| 5. Regular and moderate consumption of nuts contributes to reducing the risk of developing diabetes. |        |      |      |      |      |      |        |         |
|                                                                                                      |        | 1    | 2    | 3    | 4    | 5    | Stat.  | p-value |
| Passed                                                                                               | N =242 | 3    | 24   | 67   | 78   | 70   | 8.368  | 0.398   |
|                                                                                                      | %      | 1.2  | 9.9  | 27.7 | 32.2 | 28.9 |        |         |
| Not passed                                                                                           | N =136 | 3    | 13   | 38   | 42   | 40   |        |         |
|                                                                                                      | %      | 2.2  | 9.6  | 27.9 | 30.9 | 29.4 |        |         |
| No exam in curricula                                                                                 | N =131 | 4    | 15   | 50   | 32   | 30   |        |         |
|                                                                                                      | %      | 3.1  | 11.5 | 38.2 | 24.4 | 22.9 |        |         |
| 6. Regular and moderate consumption of nuts contributes to reducing the risk of cancer.              |        |      |      |      |      |      |        |         |
|                                                                                                      |        | 1    | 2    | 3    | 4    | 5    | Stat.  | p-value |
| Passed                                                                                               | N =242 | 9    | 43   | 83   | 59   | 48   | 10.485 | 0.233   |
|                                                                                                      | %      | 3.7  | 17.8 | 34.3 | 24.4 | 19.8 |        |         |
| Not passed                                                                                           | N =136 | 3    | 16   | 47   | 32   | 38   |        |         |
|                                                                                                      | %      | 2.2  | 11.8 | 34.6 | 23.5 | 27.9 |        |         |
| No exam in curricula                                                                                 | N =131 | 7    | 26   | 49   | 29   | 20   |        |         |
|                                                                                                      | %      | 5.3  | 19.8 | 37.4 | 22.1 | 15.3 |        |         |
| 7. Regular and moderate consumption of nuts contributes to an increase in total cholesterol.         |        |      |      |      |      |      |        |         |
|                                                                                                      |        | 1    | 2    | 3    | 4    | 5    | Stat.  | p-value |
| Passed                                                                                               | N =242 | 35   | 72   | 73   | 39   | 23   | 4.729  | 0.786   |
|                                                                                                      | %      | 14.5 | 29.8 | 30.2 | 16.1 | 9.5  |        |         |
| Not passed                                                                                           | N =136 | 14   | 33   | 54   | 21   | 14   |        |         |
|                                                                                                      | %      | 10.3 | 24.3 | 39.7 | 15.4 | 10.3 |        |         |
| No exam in curricula                                                                                 | N =131 | 18   | 35   | 46   | 20   | 12   |        |         |
|                                                                                                      | %      | 13.7 | 26.7 | 35.1 | 15.3 | 9.2  |        |         |
| 8. Consuming nuts several times a week contributes to an increase in body weight.                    |        |      |      |      |      |      |        |         |
|                                                                                                      |        | 1    | 2    | 3    | 4    | 5    | Stat.  | p-value |
| Passed                                                                                               | N =242 | 64   | 56   | 72   | 40   | 10   | 7.033  | 0.533   |



|                                                                                                   |        |      |      |      |      |      |                     |         |
|---------------------------------------------------------------------------------------------------|--------|------|------|------|------|------|---------------------|---------|
|                                                                                                   | %      | 26.4 | 23.1 | 29.8 | 16.5 | 4.1  |                     |         |
| Not passed                                                                                        | N =136 | 25   | 38   | 40   | 22   | 11   |                     |         |
|                                                                                                   | %      | 18.4 | 27.9 | 29.4 | 16.2 | 8.1  |                     |         |
| No exam in curricula                                                                              | N =131 | 31   | 29   | 36   | 25   | 10   |                     |         |
|                                                                                                   | %      | 23.7 | 22.1 | 27.5 | 19.1 | 7.6  |                     |         |
| 9. Regular consumption of nuts contributes to the reduction of inflammation.                      |        |      |      |      |      |      |                     |         |
|                                                                                                   |        | 1    | 2    | 3    | 4    | 5    | Stat.               | p-value |
| Passed                                                                                            | N =242 | 8    | 36   | 110  | 56   | 32   | 10.664              | 0.221   |
|                                                                                                   | %      | 3.3  | 14.9 | 45.5 | 23.1 | 13.2 |                     |         |
| Not passed                                                                                        | N =135 | 8    | 23   | 63   | 28   | 13   |                     |         |
|                                                                                                   | %      | 5.9  | 17.0 | 46.7 | 20.7 | 9.6  |                     |         |
| No exam in curricula                                                                              | N =131 | 8    | 20   | 74   | 17   | 12   |                     |         |
|                                                                                                   | %      | 6.1  | 15.3 | 56.5 | 13.0 | 9.2  |                     |         |
| 10. Regular consumption of nuts contributes to the maintenance of normal endothelial function.    |        |      |      |      |      |      |                     |         |
|                                                                                                   |        | 1    | 2    | 3    | 4    | 5    | Stat.               | p-value |
| Passed                                                                                            | N =242 | 4    | 21   | 94   | 81   | 42   | 18.935              | 0.015*  |
|                                                                                                   | %      | 1.7  | 8.7  | 38.8 | 33.5 | 17.4 |                     |         |
| Not passed                                                                                        | N =135 | 4    | 13   | 55   | 47   | 16   |                     |         |
|                                                                                                   | %      | 3.0  | 9.6  | 40.7 | 34.8 | 11.9 |                     |         |
| No exam in curricula                                                                              | N =131 | 4    | 18   | 70   | 23   | 16   |                     |         |
|                                                                                                   | %      | 3.1  | 13.7 | 53.4 | 17.6 | 12.2 |                     |         |
| 11. Regular consumption of nuts can have a beneficial effect on the oxidative status in the body. |        |      |      |      |      |      |                     |         |
|                                                                                                   |        | 1    | 2    | 3    | 4    | 5    | Stat.               | p-value |
| Passed                                                                                            | N =242 | 0    | 18   | 65   | 86   | 73   | 24.498 <sup>f</sup> | 0.002*  |
|                                                                                                   | %      | 0.0  | 7.4  | 26.9 | 35.5 | 30.2 |                     |         |
| Not passed                                                                                        | N =135 | 1    | 9    | 39   | 57   | 29   |                     |         |
|                                                                                                   | %      | .7   | 6.7  | 28.9 | 42.2 | 21.5 |                     |         |
| No exam in curricula                                                                              | N =131 | 3    | 17   | 52   | 35   | 24   |                     |         |
|                                                                                                   | %      | 2.3  | 13.0 | 39.7 | 26.7 | 18.3 |                     |         |
| 12. It is important to know that nuts represent a source of protein in the diet.                  |        |      |      |      |      |      |                     |         |

|                                                                                                                |        | 1   | 2    | 3    | 4    | 5    | Stat.  | p-value |
|----------------------------------------------------------------------------------------------------------------|--------|-----|------|------|------|------|--------|---------|
| Passed                                                                                                         | N =242 | 14  | 27   | 48   | 63   | 90   | 6.611  | 0.579   |
|                                                                                                                | %      | 5.8 | 11.2 | 19.8 | 26.0 | 37.2 |        |         |
| Not passed                                                                                                     | N =136 | 8   | 16   | 23   | 46   | 43   |        |         |
|                                                                                                                | %      | 5.9 | 11.8 | 16.9 | 33.8 | 31.6 |        |         |
| No exam in curricula                                                                                           | N =131 | 11  | 14   | 30   | 29   | 47   |        |         |
|                                                                                                                | %      | 8.4 | 10.7 | 22.9 | 22.1 | 35.9 |        |         |
| 13. Nuts should be consumed regularly because it is a good source of unsaturated (healthy) fats in the diet.   |        |     |      |      |      |      |        |         |
|                                                                                                                |        | 1   | 2    | 3    | 4    | 5    | Stat.  | p-value |
| Passed                                                                                                         | N =242 | 0   | 10   | 36   | 57   | 139  | 10.205 | 0.251   |
|                                                                                                                | %      | 0.0 | 4.1  | 14.9 | 23.6 | 57.4 |        |         |
| Not passed                                                                                                     | N =136 | 1   | 8    | 22   | 41   | 64   |        |         |
|                                                                                                                | %      | .7  | 5.9  | 16.2 | 30.1 | 47.1 |        |         |
| No exam in curricula                                                                                           | N =131 | 2   | 7    | 27   | 35   | 60   |        |         |
|                                                                                                                | %      | 1.5 | 5.3  | 20.6 | 26.7 | 45.8 |        |         |
| 14. Nuts should be consumed regularly because it is a good source of essential fatty acids in the diet.        |        |     |      |      |      |      |        |         |
|                                                                                                                |        | 1   | 2    | 3    | 4    | 5    | Stat.  | p-value |
| Passed                                                                                                         | N =242 | 1   | 11   | 44   | 69   | 117  | 19.354 | 0.013*  |
|                                                                                                                | %      | .4  | 4.5  | 18.2 | 28.5 | 48.3 |        |         |
| Not passed                                                                                                     | N =136 | 4   | 5    | 31   | 38   | 58   |        |         |
|                                                                                                                | %      | 2.9 | 3.7  | 22.8 | 27.9 | 42.6 |        |         |
| No exam in curricula                                                                                           | N =131 | 4   | 7    | 44   | 34   | 42   |        |         |
|                                                                                                                | %      | 3.1 | 5.3  | 33.6 | 26.0 | 32.1 |        |         |
| 15. Nuts can contribute to the preservation and improvement of health as a significant source of antioxidants. |        |     |      |      |      |      |        |         |
|                                                                                                                |        | 1   | 2    | 3    | 4    | 5    | Stat.  | p-value |
| Passed                                                                                                         | N =242 | 3   | 11   | 40   | 85   | 103  | 20.169 | 0.010*  |
|                                                                                                                | %      | 1.2 | 4.5  | 16.5 | 35.1 | 42.6 |        |         |
| Not passed                                                                                                     | N =135 | 2   | 7    | 25   | 47   | 54   |        |         |
|                                                                                                                | %      | 1.5 | 5.2  | 18.5 | 34.8 | 40.0 |        |         |
| No exam in                                                                                                     | N =131 | 6   | 7    | 42   | 33   | 43   |        |         |

|                                                                                            |         |     |      |      |      |      |                     |         |
|--------------------------------------------------------------------------------------------|---------|-----|------|------|------|------|---------------------|---------|
| curricula                                                                                  | %       | 4.6 | 5.3  | 32.1 | 25.2 | 32.8 |                     |         |
| 16. Almonds are a good nutritional source of iron in the diet.                             |         |     |      |      |      |      |                     |         |
|                                                                                            |         | 1   | 2    | 3    | 4    | 5    | Stat.               | p-value |
| Passed                                                                                     | N =242  | 15  | 37   | 83   | 55   | 52   | 9.537               | 0.299   |
|                                                                                            | %       | 6.2 | 15.3 | 34.3 | 22.7 | 21.5 |                     |         |
| Not passed                                                                                 | N =136  | 8   | 17   | 34   | 41   | 36   |                     |         |
|                                                                                            | %       | 5.9 | 12.5 | 25.0 | 30.1 | 26.5 |                     |         |
| No exam in curricula                                                                       | N =131  | 10  | 11   | 46   | 36   | 28   |                     |         |
|                                                                                            | %       | 7.6 | 8.4  | 35.1 | 27.5 | 21.4 |                     |         |
| 17. Nuts should be recommended as a healthy snack in the diet.                             |         |     |      |      |      |      |                     |         |
|                                                                                            |         | 1   | 2    | 3    | 4    | 5    | Stat.               | p-value |
| Passed                                                                                     | N =242  | 2   | 5    | 26   | 59   | 150  | 10.391 <sup>f</sup> | 0.219   |
|                                                                                            | %       | .8  | 2.1  | 10.7 | 24.4 | 62.0 |                     |         |
| Not passed                                                                                 | N =136  | 1   | 5    | 13   | 40   | 77   |                     |         |
|                                                                                            | %       | .7  | 3.7  | 9.6  | 29.4 | 56.6 |                     |         |
| No exam in curricula                                                                       | N = 131 | 4   | 7    | 20   | 30   | 70   |                     |         |
|                                                                                            | %       | 3.1 | 5.3  | 15.3 | 22.9 | 53.4 |                     |         |
| 18. The general population is not sufficiently informed about the health benefits of nuts. |         |     |      |      |      |      |                     |         |
|                                                                                            |         | 1   | 2    | 3    | 4    | 5    | Stat.               | p-value |
| Passed                                                                                     | N =242  | 3   | 7    | 32   | 53   | 147  | 10.401 <sup>f</sup> | 0.223   |
|                                                                                            | %       | 1.2 | 2.9  | 13.2 | 21.9 | 60.7 |                     |         |
| Not passed                                                                                 | N =136  | 1   | 6    | 14   | 28   | 87   |                     |         |
|                                                                                            | %       | .7  | 4.4  | 10.3 | 20.6 | 64.0 |                     |         |
| No exam in curricula                                                                       | N = 131 | 5   | 5    | 26   | 23   | 72   |                     |         |
|                                                                                            | %       | 3.8 | 3.8  | 19.8 | 17.6 | 55.0 |                     |         |
| 19. One of the main barriers to the regular consumption of nuts is the high price.         |         |     |      |      |      |      |                     |         |
|                                                                                            |         | 1   | 2    | 3    | 4    | 5    | Stat.               | p-value |
| Passed                                                                                     | N =242  | 3   | 13   | 48   | 71   | 107  | 15.541              | 0.049   |
|                                                                                            | %       | 1.2 | 5.4  | 19.8 | 29.3 | 44.2 |                     |         |
| Not passed                                                                                 | N =136  | 5   | 10   | 11   | 46   | 64   |                     |         |

|                                                                                                                   |         |      |      |      |      |      |        |         |
|-------------------------------------------------------------------------------------------------------------------|---------|------|------|------|------|------|--------|---------|
|                                                                                                                   | %       | 3.7  | 7.4  | 8.1  | 33.8 | 47.1 |        |         |
| No exam in curricula                                                                                              | N =131  | 5    | 11   | 28   | 33   | 54   |        |         |
|                                                                                                                   | %       | 3.8  | 8.4  | 21.4 | 25.2 | 41.2 |        |         |
| 20. I rarely consume nuts for fear of gaining weight.                                                             |         |      |      |      |      |      |        |         |
|                                                                                                                   |         | 1    | 2    | 3    | 4    | 5    | Stat.  | p-value |
| Passed                                                                                                            | N = 242 | 153  | 34   | 29   | 17   | 9    | 12.755 | 0.121   |
|                                                                                                                   | %       | 63.2 | 14.0 | 12.0 | 7.0  | 3.7  |        |         |
| Not passed                                                                                                        | N = 136 | 71   | 24   | 24   | 10   | 7    |        |         |
|                                                                                                                   | %       | 52.2 | 17.6 | 17.6 | 7.4  | 5.1  |        |         |
| No exam in curricula                                                                                              | N = 131 | 69   | 13   | 28   | 12   | 9    |        |         |
|                                                                                                                   | %       | 52.7 | 9.9  | 21.4 | 9.2  | 6.9  |        |         |
| 21. I would try to consume nuts more often if recommended by a doctor, nutritionist or other health professional. |         |      |      |      |      |      |        |         |
|                                                                                                                   |         | 1    | 2    | 3    | 4    | 5    | Stat.  | p-value |
| Passed                                                                                                            | N = 242 | 32   | 29   | 56   | 52   | 73   | 6.275  | 0.616   |
|                                                                                                                   | %       | 13.2 | 12.0 | 23.1 | 21.5 | 30.2 |        |         |
| Not passed                                                                                                        | N = 136 | 16   | 12   | 30   | 32   | 46   |        |         |
|                                                                                                                   | %       | 11.8 | 8.8  | 22.1 | 23.5 | 33.8 |        |         |
| No exam in curricula                                                                                              | N = 131 | 22   | 15   | 35   | 19   | 40   |        |         |
|                                                                                                                   | %       | 16.8 | 11.5 | 26.7 | 14.5 | 30.5 |        |         |
| 22. Nuts are one of the most common causes of allergic reactions to food.                                         |         |      |      |      |      |      |        |         |
|                                                                                                                   |         | 1    | 2    | 3    | 4    | 5    | Stat.  | p-value |
| Passed                                                                                                            | N = 242 | 7    | 20   | 47   | 73   | 95   | 42.558 | <0.001* |
|                                                                                                                   | %       | 2.9  | 8.3  | 19.4 | 30.2 | 39.3 |        |         |
| Not passed                                                                                                        | N = 136 | 10   | 17   | 31   | 50   | 28   |        |         |
|                                                                                                                   | %       | 7.4  | 12.5 | 22.8 | 36.8 | 20.6 |        |         |
| No exam in curricula                                                                                              | N = 131 | 17   | 19   | 39   | 33   | 23   |        |         |
|                                                                                                                   | %       | 13.0 | 14.5 | 29.8 | 25.2 | 17.6 |        |         |

***The influence of passing the nutrition-related exam (Bromatology) on the knowledge about nuts***

| Question                                                                                                            | Answer                 | Passed Bromatology (N=242) |                    | Not passed Bromatology (N=136) |                    | No exam in curricula (N=131) |      | Test    |         |
|---------------------------------------------------------------------------------------------------------------------|------------------------|----------------------------|--------------------|--------------------------------|--------------------|------------------------------|------|---------|---------|
|                                                                                                                     |                        | Correct answer (N)         | Correct answer (N) | Correct answer (N)             | Correct answer (N) | N                            | %    | Stat.   | p       |
| <b>1. In the dietary recommendations (nutrition pyramid), nuts are classified together with the group of foods:</b> | Cereals                | 74                         | 30.6               | 36                             | 26.5               | 31                           | 23.7 | 60.982  | <0.001* |
|                                                                                                                     | milk and milk products | 7                          | 2.9                | 5                              | 3.7                | 2                            | 1.5  |         |         |
|                                                                                                                     | Fruits                 | 70                         | 28.9               | 20                             | 14.7               | 17                           | 13.0 |         |         |
|                                                                                                                     | Vegetables             | 4                          | 1.7                | 0                              | 0.0                | 0                            | 0.0  |         |         |
|                                                                                                                     | <i>meat and eggs</i>   | 36                         | 14.9               | 18                             | 13.2               | 13                           | 9.9  |         |         |
|                                                                                                                     | Oils                   | 22                         | 9.1                | 8                              | 5.9                | 12                           | 9.2  |         |         |
|                                                                                                                     | I do not know          | 29                         | 12.0               | 49                             | 36.0               | 56                           | 42.7 |         |         |
| <b>2. Nuts are an important food group in the Mediterranean diet:</b>                                               | <i>Yes</i>             | 175                        | 72.3               | 74                             | 54.4               | 51                           | 38.9 | 55.695  | <0.001* |
|                                                                                                                     | No                     | 20                         | 8.3                | 10                             | 7.4                | 5                            | 3.8  |         |         |
|                                                                                                                     | I do not know          | 47                         | 19.4               | 52                             | 38.2               | 75                           | 57.3 |         |         |
| <b>3. Nuts are an important food group in the DASH diet:</b>                                                        | <i>Yes</i>             | 123                        | 50.8               | 13                             | 9.6                | 14                           | 10.7 | 135.042 | <0.001* |
|                                                                                                                     | No                     | 17                         | 7.0                | 1                              | 0.7                | 0                            | 0.0  |         |         |
|                                                                                                                     | I do not know          | 102                        | 42.1               | 121                            | 89.7               | 117                          | 89.3 |         |         |
| <b>4. Nuts are definitely not a source of which mineral in the diet?</b>                                            | Selenium               | 8                          | 3.3                | 2                              | 1.5                | 0                            | 0.0  | 36.713  | <0.001* |
|                                                                                                                     | <i>Iodine</i>          | 101                        | 41.7               | 53                             | 39.0               | 27                           | 20.6 |         |         |
|                                                                                                                     | Magnesium              | 20                         | 8.3                | 5                              | 3.7                | 6                            | 4.6  |         |         |
|                                                                                                                     | Iron                   | 16                         | 6.6                | 6                              | 4.4                | 9                            | 6.9  |         |         |
|                                                                                                                     | Zinc                   | 15                         | 6.2                | 8                              | 5.9                | 7                            | 5.3  |         |         |
|                                                                                                                     | I do not know          | 82                         | 33.9               | 62                             | 45.6               | 82                           | 62.2 |         |         |
| <b>5. Nuts are a rich source of which vitamin in the diet?</b>                                                      | vitamin A              | 12                         | 5.0                | 5                              | 3.7                | 7                            | 5.3  | 75.897  | <0.001* |
|                                                                                                                     | vitamin C              | 8                          | 3.3                | 2                              | 1.5                | 4                            | 3.1  |         |         |
|                                                                                                                     | <i>vitamin E</i>       | 138                        | 57.0               | 35                             | 25.7               | 27                           | 20.6 |         |         |
|                                                                                                                     | vitamin D              | 7                          | 2.9                | 8                              | 5.9                | 4                            | 3.1  |         |         |
|                                                                                                                     | vitamin B12            | 35                         | 14.5               | 28                             | 20.6               | 25                           | 19.1 |         |         |
|                                                                                                                     | I do not know          | 42                         | 17.4               | 58                             | 42.6               | 64                           | 48.9 |         |         |
| <b>6. Which of the nuts representatives is considered a good source of dietary selenium?</b>                        | Almond                 | 31                         | 12.8               | 11                             | 8.1                | 10                           | 7.6  | 38.577  | <0.001* |
|                                                                                                                     | Hazelnut               | 5                          | 2.1                | 2                              | 1.5                | 1                            | 0.8  |         |         |
|                                                                                                                     | <i>Brazilian nut</i>   | 71                         | 29.3               | 29                             | 21.3               | 21                           | 16.0 |         |         |
|                                                                                                                     | Walnut                 | 18                         | 7.4                | 6                              | 4.4                | 2                            | 1.5  |         |         |

|                                                                                                                                                                                                                                             |                      |     |      |    |      |     |      |        |         |
|---------------------------------------------------------------------------------------------------------------------------------------------------------------------------------------------------------------------------------------------|----------------------|-----|------|----|------|-----|------|--------|---------|
|                                                                                                                                                                                                                                             | Cashew               | 39  | 16.1 | 13 | 9.6  | 17  | 13.0 |        |         |
|                                                                                                                                                                                                                                             | I do not know        | 78  | 32.2 | 75 | 55.1 | 80  | 61.1 |        |         |
| <b>7. Nuts are primarily a source of which polyunsaturated fatty acid?</b>                                                                                                                                                                  | EPA                  | 34  | 14.0 | 4  | 2.9  | 1   | 0.8  | 98.091 | <0.001* |
|                                                                                                                                                                                                                                             | DHA                  | 22  | 9.1  | 2  | 1.5  | 4   | 3.1  |        |         |
|                                                                                                                                                                                                                                             | <i>linoleic acid</i> | 21  | 8.7  | 16 | 11.8 | 5   | 3.8  |        |         |
|                                                                                                                                                                                                                                             | alpha-linolenic acid | 48  | 19.8 | 9  | 6.6  | 6   | 4.6  |        |         |
|                                                                                                                                                                                                                                             | arachidonic acid     | 14  | 5.8  | 17 | 12.5 | 4   | 3.1  |        |         |
|                                                                                                                                                                                                                                             | I do not know        | 103 | 42.6 | 88 | 64.7 | 111 | 84.7 |        |         |
| <b>8. Which of nuts has the highest content of saturated fatty acids and is therefore the least recommended in the diet compared to other stone fruits?</b>                                                                                 | Peanuts              | 123 | 50.8 | 48 | 35.3 | 48  | 36.6 | 29.515 | 0.001*  |
|                                                                                                                                                                                                                                             | Almond               | 14  | 5.8  | 9  | 6.6  | 7   | 5.3  |        |         |
|                                                                                                                                                                                                                                             | Walnut               | 16  | 6.6  | 5  | 3.7  | 2   | 1.5  |        |         |
|                                                                                                                                                                                                                                             | Hazelnut             | 3   | 1.2  | 2  | 1.5  | 3   | 2.3  |        |         |
|                                                                                                                                                                                                                                             | <i>Cashew</i>        | 30  | 12.4 | 12 | 8.8  | 14  | 10.7 |        |         |
|                                                                                                                                                                                                                                             | I do not know        | 56  | 23.1 | 60 | 44.1 | 57  | 43.5 |        |         |
| <b>9. There is an approved health claim for walnuts that reads: "Walnuts contribute to improving the elasticity of blood vessels." The stated health statement refers to the daily intake of walnuts in which of the stated quantities?</b> | 10g                  | 25  | 10.3 | 10 | 7.4  | 7   | 5.3  | 20.212 | 0.063   |
|                                                                                                                                                                                                                                             | 15g                  | 37  | 15.3 | 27 | 19.9 | 12  | 9.2  |        |         |
|                                                                                                                                                                                                                                             | 30g                  | 63  | 26.0 | 23 | 16.9 | 26  | 19.8 |        |         |
|                                                                                                                                                                                                                                             | 50g                  | 14  | 5.8  | 10 | 7.4  | 13  | 9.9  |        |         |
|                                                                                                                                                                                                                                             | 100g                 | 6   | 2.5  | 3  | 2.2  | 2   | 1.5  |        |         |
|                                                                                                                                                                                                                                             | more than 100g       | 0   | 0.0  | 0  | 0.0  | 1   | 0.8  |        |         |
|                                                                                                                                                                                                                                             | I do not know        | 97  | 40.1 | 63 | 46.3 | 70  | 53.4 |        |         |
| <b>10. The usual thermal processing of nuts has an effect on their chemical composition and thus on their health effects, in which direction: :</b>                                                                                         | <i>Lowers</i>        | 145 | 59.9 | 65 | 47.8 | 51  | 38.9 | 24.438 | <0.001* |
|                                                                                                                                                                                                                                             | increases            | 10  | 4.1  | 5  | 3.7  | 4   | 3.1  |        |         |
|                                                                                                                                                                                                                                             | do not change        | 33  | 13.6 | 15 | 11.0 | 16  | 12.2 |        |         |
|                                                                                                                                                                                                                                             | I do not know        | 54  | 22.3 | 51 | 37.5 | 60  | 45.8 |        |         |
| <b>11. Thermal processing of nuts impacts allergenicity, in which direction:</b>                                                                                                                                                            | Lowers               | 59  | 24.4 | 25 | 18.4 | 12  | 9.2  | 31.073 | <0.001* |
|                                                                                                                                                                                                                                             | increases            | 19  | 7.9  | 11 | 8.1  | 9   | 6.9  |        |         |
|                                                                                                                                                                                                                                             | <i>do not change</i> | 81  | 33.5 | 34 | 25.0 | 28  | 21.4 |        |         |
|                                                                                                                                                                                                                                             | I do not know        | 83  | 34.3 | 66 | 48.5 | 82  | 62.6 |        |         |
| <b>12. According to its</b>                                                                                                                                                                                                                 | <i>True</i>          | 128 | 52.9 | 64 | 47.1 | 39  | 29.8 | 22.830 | <0.001* |

|                                                                                                                          |                                    |     |      |    |      |    |      |        |        |
|--------------------------------------------------------------------------------------------------------------------------|------------------------------------|-----|------|----|------|----|------|--------|--------|
| <b>composition and health effects, peanuts can be counted as a nut, even though it belongs to the leguminous family:</b> | False                              | 19  | 7.9  | 13 | 9.6  | 8  | 6.1  |        |        |
|                                                                                                                          | I do not know                      | 95  | 39.3 | 59 | 43.3 | 84 | 64.1 |        |        |
| <b>13. By what characteristic does the chestnut significantly differ from other types of nuts?</b>                       | low content of mineral substances  | 8   | 3.3  | 3  | 2.2  | 5  | 3.8  | 22.498 | 0.004* |
|                                                                                                                          | lower content of vitamin C         | 10  | 4.1  | 4  | 2.9  | 4  | 3.1  |        |        |
|                                                                                                                          | higher energy value                | 23  | 9.5  | 6  | 4.4  | 8  | 6.1  |        |        |
|                                                                                                                          | <i>higher carbohydrate content</i> | 75  | 31.0 | 25 | 18.4 | 21 | 16.0 |        |        |
|                                                                                                                          | I do not know                      | 126 | 52.1 | 98 | 72.1 | 93 | 71.0 |        |        |

*Correct answers are indicated in italic.*

***The influence of passing the nutrition-related exam (Nutrition) on attitudes regarding the health effects and nutritional importance of nuts***

| 1. Nuts represent a group of foods of exceptional nutritional value.                                                |         |     |     |      |      |      |                     |         |
|---------------------------------------------------------------------------------------------------------------------|---------|-----|-----|------|------|------|---------------------|---------|
|                                                                                                                     |         | 1   | 2   | 3    | 4    | 5    | Stat.               | p-value |
| Passed Nutrition                                                                                                    | N = 187 | 1   | 4   | 28   | 50   | 104  | 7.147 <sup>f</sup>  | 0.500   |
|                                                                                                                     | %       | .5  | 2.1 | 15.0 | 26.7 | 55.6 |                     |         |
| Not passed                                                                                                          | N = 181 | 1   | 5   | 21   | 63   | 91   |                     |         |
|                                                                                                                     | %       | .6  | 2.8 | 11.6 | 34.8 | 50.3 |                     |         |
| Not in curricula                                                                                                    | N = 140 | 1   | 5   | 26   | 36   | 72   |                     |         |
|                                                                                                                     | %       | .7  | 3.6 | 18.6 | 25.7 | 51.4 |                     |         |
| 2. Regular consumption of nuts can have beneficial effects on health.                                               |         |     |     |      |      |      |                     |         |
|                                                                                                                     |         | 1   | 2   | 3    | 4    | 5    | Stat.               | p-value |
| Passed Nutrition                                                                                                    | N = 187 | 0   | 6   | 14   | 52   | 115  | 19.412 <sup>f</sup> | 0.006*  |
|                                                                                                                     | %       | 0.0 | 3.2 | 7.5  | 27.8 | 61.5 |                     |         |
| Not passed                                                                                                          | N = 181 | 0   | 2   | 22   | 51   | 106  |                     |         |
|                                                                                                                     | %       | 0.0 | 1.1 | 12.2 | 28.2 | 58.6 |                     |         |
| Not in curricula                                                                                                    | N = 140 | 1   | 8   | 26   | 41   | 64   |                     |         |
|                                                                                                                     | %       | .7  | 5.7 | 18.6 | 29.3 | 45.7 |                     |         |
| 3. Consuming nuts contributes to the maintenance of normal lipid status.                                            |         |     |     |      |      |      |                     |         |
|                                                                                                                     |         | 1   | 2   | 3    | 4    | 5    | Stat.               | p-value |
| Passed Nutrition                                                                                                    | N = 187 | 3   | 3   | 44   | 58   | 79   | 18.406              | 0.018*  |
|                                                                                                                     | %       | 1.6 | 1.6 | 23.5 | 31.0 | 42.2 |                     |         |
| Not passed                                                                                                          | N = 180 | 1   | 10  | 43   | 55   | 71   |                     |         |
|                                                                                                                     | %       | .6  | 5.6 | 23.9 | 30.6 | 39.4 |                     |         |
| Not in curricula                                                                                                    | N = 140 | 2   | 8   | 54   | 32   | 44   |                     |         |
|                                                                                                                     | %       | 1.4 | 5.7 | 38.6 | 22.9 | 31.4 |                     |         |
| 4. Regular and moderate consumption of nuts contributes to reducing the risk of developing cardiovascular diseases. |         |     |     |      |      |      |                     |         |
|                                                                                                                     |         | 1   | 2   | 3    | 4    | 5    | Stat.               | p-value |
| Passed Nutrition                                                                                                    | N = 187 | 0   | 8   | 36   | 67   | 76   | 18.187              | 0.020*  |
|                                                                                                                     | %       | 0.0 | 4.3 | 19.3 | 35.8 | 40.6 |                     |         |
| Not passed                                                                                                          | N = 181 | 0   | 5   | 46   | 56   | 74   |                     |         |



|                                                                                                      |         |      |      |      |      |      |       |         |
|------------------------------------------------------------------------------------------------------|---------|------|------|------|------|------|-------|---------|
|                                                                                                      | %       | 0.0  | 2.8  | 25.4 | 30.9 | 40.9 |       |         |
| Not in curricula                                                                                     | N = 140 | 4    | 9    | 37   | 46   | 44   |       |         |
|                                                                                                      | %       | 2.9  | 6.4  | 26.4 | 32.9 | 31.4 |       |         |
| 5. Regular and moderate consumption of nuts contributes to reducing the risk of developing diabetes. |         |      |      |      |      |      |       |         |
|                                                                                                      |         | 1    | 2    | 3    | 4    | 5    | Stat. | p-value |
| Passed Nutrition                                                                                     | N = 187 | 3    | 17   | 48   | 66   | 53   | 9.374 | 0.312   |
|                                                                                                      | %       | 1.6  | 9.1  | 25.7 | 35.3 | 28.3 |       |         |
| Not passed                                                                                           | N = 181 | 3    | 18   | 55   | 53   | 52   |       |         |
|                                                                                                      | %       | 1.7  | 9.9  | 30.4 | 29.3 | 28.7 |       |         |
| Not in curricula                                                                                     | N = 140 | 4    | 17   | 52   | 33   | 34   |       |         |
|                                                                                                      | %       | 2.9  | 12.1 | 37.1 | 23.6 | 24.3 |       |         |
| 6. Regular and moderate consumption of nuts contributes to reducing the risk of cancer.              |         |      |      |      |      |      |       |         |
|                                                                                                      |         | 1    | 2    | 3    | 4    | 5    | Stat. | p-value |
| Passed Nutrition                                                                                     | N = 187 | 7    | 30   | 67   | 50   | 33   | 7.488 | 0.485   |
|                                                                                                      | %       | 3.7  | 16.0 | 35.8 | 26.7 | 17.6 |       |         |
| Not passed                                                                                           | N = 181 | 6    | 25   | 63   | 41   | 46   |       |         |
|                                                                                                      | %       | 3.3  | 13.8 | 34.8 | 22.7 | 25.4 |       |         |
| Not in curricula                                                                                     | N = 140 | 6    | 30   | 49   | 29   | 26   |       |         |
|                                                                                                      | %       | 4.3  | 21.4 | 35.0 | 20.7 | 18.6 |       |         |
| 7. Regular and moderate consumption of nuts contributes to an increase in total cholesterol.         |         |      |      |      |      |      |       |         |
|                                                                                                      |         | 1    | 2    | 3    | 4    | 5    | Stat. | p-value |
| Passed Nutrition                                                                                     | N = 187 | 28   | 50   | 56   | 34   | 19   | 4.345 | 0.825   |
|                                                                                                      | %       | 15.0 | 26.7 | 29.9 | 18.2 | 10.2 |       |         |
| Not passed                                                                                           | N = 181 | 22   | 53   | 67   | 24   | 15   |       |         |
|                                                                                                      | %       | 12.2 | 29.3 | 37.0 | 13.3 | 8.3  |       |         |
| Not in curricula                                                                                     | N = 140 | 17   | 37   | 50   | 22   | 14   |       |         |
|                                                                                                      | %       | 12.1 | 26.4 | 35.7 | 15.7 | 10.0 |       |         |
| 8. Consuming nuts several times a week contributes to an increase in body weight.                    |         |      |      |      |      |      |       |         |
|                                                                                                      |         | 1    | 2    | 3    | 4    | 5    | Stat. | p-value |
| Passed                                                                                               | N = 187 | 48   | 41   | 55   | 34   | 9    | 5.336 | 0.721   |

|                                                                                                   |         |      |      |      |      |      |        |         |
|---------------------------------------------------------------------------------------------------|---------|------|------|------|------|------|--------|---------|
| Nutrition                                                                                         | %       | 25.7 | 21.9 | 29.4 | 18.2 | 4.8  |        |         |
| Not passed                                                                                        | N = 181 | 39   | 51   | 54   | 26   | 11   |        |         |
|                                                                                                   | %       | 21.5 | 28.2 | 29.8 | 14.4 | 6.1  |        |         |
| Not in curricula                                                                                  | N = 140 | 33   | 30   | 39   | 27   | 11   |        |         |
|                                                                                                   | %       | 23.6 | 21.4 | 27.9 | 19.3 | 7.9  |        |         |
| 9. Regular consumption of nuts contributes to the reduction of inflammation.                      |         |      |      |      |      |      |        |         |
|                                                                                                   |         | 1    | 2    | 3    | 4    | 5    | Stat.  | p-value |
| Passed Nutrition                                                                                  | N = 187 | 2    | 26   | 86   | 46   | 27   | 19.527 | 0.012*  |
|                                                                                                   | %       | 1.1  | 13.9 | 46.0 | 24.6 | 14.4 |        |         |
| Not passed                                                                                        | N = 180 | 11   | 32   | 86   | 36   | 15   |        |         |
|                                                                                                   | %       | 6.1  | 17.8 | 47.8 | 20.0 | 8.3  |        |         |
| Not in curricula                                                                                  | N = 140 | 11   | 21   | 75   | 18   | 15   |        |         |
|                                                                                                   | %       | 7.9  | 15.0 | 53.6 | 12.9 | 10.7 |        |         |
| 10. Regular consumption of nuts contributes to the maintenance of normal endothelial function.    |         |      |      |      |      |      |        |         |
|                                                                                                   |         | 1    | 2    | 3    | 4    | 5    | Stat.  | p-value |
| Passed Nutrition                                                                                  | N = 187 | 4    | 19   | 65   | 66   | 33   | 21.721 | 0.005*  |
|                                                                                                   | %       | 2.1  | 10.2 | 34.8 | 35.3 | 17.6 |        |         |
| Not passed                                                                                        | N = 180 | 4    | 16   | 78   | 61   | 21   |        |         |
|                                                                                                   | %       | 2.2  | 8.9  | 43.3 | 33.9 | 11.7 |        |         |
| Not in curricula                                                                                  | N = 140 | 4    | 17   | 76   | 23   | 20   |        |         |
|                                                                                                   | %       | 2.9  | 12.1 | 54.3 | 16.4 | 14.3 |        |         |
| 11. Regular consumption of nuts can have a beneficial effect on the oxidative status in the body. |         |      |      |      |      |      |        |         |
|                                                                                                   |         | 1    | 2    | 3    | 4    | 5    | Stat.  | p-value |
| Passed Nutrition                                                                                  | N = 187 | 1    | 12   | 56   | 67   | 51   | 14.363 | 0.073   |
|                                                                                                   | %       | .5   | 6.4  | 29.9 | 35.8 | 27.3 |        |         |
| Not passed                                                                                        | N = 180 | 1    | 14   | 47   | 73   | 45   |        |         |
|                                                                                                   | %       | .6   | 7.8  | 26.1 | 40.6 | 25.0 |        |         |
| Not in curricula                                                                                  | N = 140 | 2    | 18   | 53   | 37   | 30   |        |         |
|                                                                                                   | %       | 1.4  | 12.9 | 37.9 | 26.4 | 21.4 |        |         |
| 12. It is important to know that nuts represent a source of protein in the diet.                  |         |      |      |      |      |      |        |         |

|                                                                                                                |         | 1   | 2    | 3    | 4    | 5    | Stat.  | p-value |
|----------------------------------------------------------------------------------------------------------------|---------|-----|------|------|------|------|--------|---------|
| Passed Nutrition                                                                                               | N = 187 | 12  | 19   | 42   | 51   | 63   | 7.067  | 0.529   |
|                                                                                                                | %       | 6.4 | 10.2 | 22.5 | 27.3 | 33.7 |        |         |
| Not passed                                                                                                     | N = 181 | 9   | 24   | 28   | 54   | 66   |        |         |
|                                                                                                                | %       | 5.0 | 13.3 | 15.5 | 29.8 | 36.5 |        |         |
| Not in curricula                                                                                               | N = 140 | 12  | 14   | 31   | 32   | 51   |        |         |
|                                                                                                                | %       | 8.6 | 10.0 | 22.1 | 22.9 | 36.4 |        |         |
| 13. Nuts should be consumed regularly because it is a good source of unsaturated (healthy) fats in the diet.   |         |     |      |      |      |      |        |         |
|                                                                                                                |         | 1   | 2    | 3    | 4    | 5    | Stat.  | p-value |
| Passed Nutrition                                                                                               | N = 187 | 0   | 9    | 29   | 47   | 102  | 4.496  | 0.810   |
|                                                                                                                | %       | 0.0 | 4.8  | 15.5 | 25.1 | 54.5 |        |         |
| Not passed                                                                                                     | N = 181 | 1   | 8    | 30   | 48   | 94   |        |         |
|                                                                                                                | %       | .6  | 4.4  | 16.6 | 26.5 | 51.9 |        |         |
| Not in curricula                                                                                               | N = 140 | 2   | 8    | 26   | 38   | 66   |        |         |
|                                                                                                                | %       | 1.4 | 5.7  | 18.6 | 27.1 | 47.1 |        |         |
| 14. Nuts should be consumed regularly because it is a good source of essential fatty acids in the diet         |         |     |      |      |      |      |        |         |
|                                                                                                                |         | 1   | 2    | 3    | 4    | 5    | Stat.  | p-value |
| Passed Nutrition                                                                                               | N = 187 | 2   | 6    | 35   | 57   | 87   | 14.084 | 0.080   |
|                                                                                                                | %       | 1.1 | 3.2  | 18.7 | 30.5 | 46.5 |        |         |
| Not passed                                                                                                     | N = 181 | 4   | 9    | 38   | 48   | 82   |        |         |
|                                                                                                                | %       | 2.2 | 5.0  | 21.0 | 26.5 | 45.3 |        |         |
| Not in curricula                                                                                               | N = 140 | 3   | 8    | 46   | 36   | 47   |        |         |
|                                                                                                                | %       | 2.1 | 5.7  | 32.9 | 25.7 | 33.6 |        |         |
| 15. Nuts can contribute to the preservation and improvement of health as a significant source of antioxidants. |         |     |      |      |      |      |        |         |
|                                                                                                                |         | 1   | 2    | 3    | 4    | 5    | Stat.  | p-value |
| Passed Nutrition                                                                                               | N = 187 | 4   | 7    | 32   | 68   | 76   | 16.059 | 0.042*  |
|                                                                                                                | %       | 2.1 | 3.7  | 17.1 | 36.4 | 40.6 |        |         |
| Not passed                                                                                                     | N = 180 | 1   | 10   | 34   | 60   | 75   |        |         |
|                                                                                                                | %       | .6  | 5.6  | 18.9 | 33.3 | 41.7 |        |         |
| Not in curricula                                                                                               | N = 140 | 6   | 8    | 41   | 36   | 49   |        |         |

|                                                                                            |         |     |      |      |      |      |                    |         |
|--------------------------------------------------------------------------------------------|---------|-----|------|------|------|------|--------------------|---------|
|                                                                                            | %       | 4.3 | 5.7  | 29.3 | 25.7 | 35.0 |                    |         |
| 16. Almonds are a good nutritional source of iron in the diet.                             |         |     |      |      |      |      |                    |         |
|                                                                                            |         | 1   | 2    | 3    | 4    | 5    | Stat.              | p-value |
| Passed Nutrition                                                                           | N = 187 | 13  | 27   | 63   | 42   | 42   | 3.934              | 0.863   |
|                                                                                            | %       | 7.0 | 14.4 | 33.7 | 22.5 | 22.5 |                    |         |
| Not passed                                                                                 | N = 181 | 10  | 23   | 52   | 53   | 43   |                    |         |
|                                                                                            | %       | 5.5 | 12.7 | 28.7 | 29.3 | 23.8 |                    |         |
| Not in curricula                                                                           | N = 140 | 10  | 15   | 47   | 37   | 31   |                    |         |
|                                                                                            | %       | 7.1 | 10.7 | 33.6 | 26.4 | 22.1 |                    |         |
| 17. Nuts should be recommended as a healthy snack in the diet.                             |         |     |      |      |      |      |                    |         |
|                                                                                            |         | 1   | 2    | 3    | 4    | 5    | Stat.              | p-value |
| Passed Nutrition                                                                           | N = 187 | 2   | 5    | 20   | 47   | 113  | 8.503 <sup>f</sup> | 0.375   |
|                                                                                            | %       | 1.1 | 2.7  | 10.7 | 25.1 | 60.4 |                    |         |
| Not passed                                                                                 | N = 181 | 1   | 5    | 17   | 49   | 109  |                    |         |
|                                                                                            | %       | .6  | 2.8  | 9.4  | 27.1 | 60.2 |                    |         |
| Not in curricula                                                                           | N = 140 | 4   | 7    | 22   | 33   | 74   |                    |         |
|                                                                                            | %       | 2.9 | 5.0  | 15.7 | 23.6 | 52.9 |                    |         |
| 18. The general population is not sufficiently informed about the health benefits of nuts. |         |     |      |      |      |      |                    |         |
|                                                                                            |         | 1   | 2    | 3    | 4    | 5    | Stat.              | p-value |
| Passed Nutrition                                                                           | N = 187 | 4   | 6    | 25   | 39   | 113  | 8.343 <sup>f</sup> | 0.394   |
|                                                                                            | %       | 2.1 | 3.2  | 13.4 | 20.9 | 60.4 |                    |         |
| Not passed                                                                                 | N = 181 | 1   | 8    | 21   | 42   | 109  |                    |         |
|                                                                                            | %       | .6  | 4.4  | 11.6 | 23.2 | 60.2 |                    |         |
| Not in curricula                                                                           | N = 140 | 4   | 4    | 26   | 22   | 84   |                    |         |
|                                                                                            | %       | 2.9 | 2.9  | 18.6 | 15.7 | 60.0 |                    |         |
| 19. One of the main barriers to the regular consumption of nuts is the high price.         |         |     |      |      |      |      |                    |         |
|                                                                                            |         | 1   | 2    | 3    | 4    | 5    | Stat.              | p-value |
| Passed Nutrition                                                                           | N = 187 | 3   | 10   | 35   | 56   | 83   | 9.058              | 0.337   |
|                                                                                            | %       | 1.6 | 5.3  | 18.7 | 29.9 | 44.4 |                    |         |
| Not passed                                                                                 | N = 181 | 6   | 11   | 23   | 60   | 81   |                    |         |

|                                                                                                                   |         |      |      |      |      |      |        |         |
|-------------------------------------------------------------------------------------------------------------------|---------|------|------|------|------|------|--------|---------|
|                                                                                                                   | %       | 3.3  | 6.1  | 12.7 | 33.1 | 44.8 |        |         |
| Not in curricula                                                                                                  | N = 140 | 4    | 13   | 29   | 33   | 61   |        |         |
|                                                                                                                   | %       | 2.9  | 9.3  | 20.7 | 23.6 | 43.6 |        |         |
| 20. I rarely consume nuts for fear of gaining weight.                                                             |         |      |      |      |      |      |        |         |
|                                                                                                                   |         | 1    | 2    | 3    | 4    | 5    | Stat.  | p-value |
| Passed Nutrition                                                                                                  | N = 187 | 113  | 26   | 27   | 15   | 6    | 11.288 | 0.186   |
|                                                                                                                   | %       | 60.4 | 13.9 | 14.4 | 8.0  | 3.2  |        |         |
| Not passed                                                                                                        | N = 181 | 106  | 31   | 25   | 10   | 9    |        |         |
|                                                                                                                   | %       | 58.6 | 17.1 | 13.8 | 5.5  | 5.0  |        |         |
| Not in curricula                                                                                                  | N = 140 | 73   | 14   | 29   | 14   | 10   |        |         |
|                                                                                                                   | %       | 52.1 | 10.0 | 20.7 | 10.0 | 7.1  |        |         |
| 21. I would try to consume nuts more often if recommended by a doctor, nutritionist or other health professional. |         |      |      |      |      |      |        |         |
|                                                                                                                   |         | 1    | 2    | 3    | 4    | 5    | Stat.  | p-value |
| Passed Nutrition                                                                                                  | N = 187 | 26   | 22   | 46   | 40   | 53   | 4.638  | 0.795   |
|                                                                                                                   | %       | 13.9 | 11.8 | 24.6 | 21.4 | 28.3 |        |         |
| Not passed                                                                                                        | N = 181 | 23   | 16   | 40   | 41   | 61   |        |         |
|                                                                                                                   | %       | 12.7 | 8.8  | 22.1 | 22.7 | 33.7 |        |         |
| Not in curricula                                                                                                  | N = 140 | 21   | 17   | 35   | 22   | 45   |        |         |
|                                                                                                                   | %       | 15.0 | 12.1 | 25.0 | 15.7 | 32.1 |        |         |
| 22. Nuts are one of the most common causes of allergic reactions to food.                                         |         |      |      |      |      |      |        |         |
|                                                                                                                   |         | 1    | 2    | 3    | 4    | 5    | Stat.  | p-value |
| Passed Nutrition                                                                                                  | N = 187 | 10   | 19   | 33   | 56   | 69   | 25.139 | 0.001*  |
|                                                                                                                   | %       | 5.3  | 10.2 | 17.6 | 29.9 | 36.9 |        |         |
| Not passed                                                                                                        | N = 181 | 9    | 17   | 40   | 67   | 48   |        |         |
|                                                                                                                   | %       | 5.0  | 9.4  | 22.1 | 37.0 | 26.5 |        |         |
| Not in curricula                                                                                                  | N = 140 | 15   | 20   | 43   | 33   | 29   |        |         |
|                                                                                                                   | %       | 10.7 | 14.3 | 30.7 | 23.6 | 20.7 |        |         |

*The influence of passing the Nutrition-related exam (Nutrition) on knowledge about nuts*

| Question                                                                                                            | Answer                 | Passed<br>(N=187) |      | Not passed<br>(N=181) |      | No exam in<br>curricula<br>(N=140) |      | Test    |         |
|---------------------------------------------------------------------------------------------------------------------|------------------------|-------------------|------|-----------------------|------|------------------------------------|------|---------|---------|
|                                                                                                                     |                        | N                 | %    | N                     | %    | N                                  | %    | Stat.   | p       |
| <b>1. In the dietary recommendations (nutrition pyramid), nuts are classified together with the group of foods:</b> | Cereals                | 59                | 31.6 | 47                    | 26.0 | 35                                 | 25.0 | 47.260  | <0.001* |
|                                                                                                                     | milk and milk products | 9                 | 4.8  | 3                     | 1.7  | 2                                  | 1.4  |         |         |
|                                                                                                                     | Fruits                 | 51                | 27.3 | 36                    | 19.9 | 20                                 | 14.3 |         |         |
|                                                                                                                     | Vegetables             | 2                 | 1.1  | 2                     | 1.1  | 0                                  | 0.0  |         |         |
|                                                                                                                     | meat and eggs          | 26                | 13.9 | 29                    | 16.0 | 12                                 | 8.6  |         |         |
|                                                                                                                     | Oils                   | 18                | 9.6  | 11                    | 6.1  | 13                                 | 9.3  |         |         |
|                                                                                                                     | I do not know          | 22                | 11.8 | 53                    | 29.3 | 58                                 | 41.4 |         |         |
| <b>2. Nuts are an important food group in the Mediterranean diet:</b>                                               | Yes                    | 135               | 72.2 | 106                   | 58.6 | 58                                 | 41.4 | 53.314  | <0.001* |
|                                                                                                                     | No                     | 20                | 10.7 | 10                    | 5.5  | 5                                  | 3.6  |         |         |
|                                                                                                                     | I do not know          | 32                | 17.1 | 65                    | 35.9 | 77                                 | 55.0 |         |         |
| <b>3. Nuts are an important food group in the DASH diet:</b>                                                        | Yes                    | 110               | 58.8 | 23                    | 12.7 | 17                                 | 12.1 | 172.271 | <0.001* |
|                                                                                                                     | No                     | 18                | 9.6  | 0                     | 0.0  | 0                                  | 0.0  |         |         |
|                                                                                                                     | I do not know          | 59                | 31.6 | 158                   | 87.3 | 123                                | 87.9 |         |         |
| <b>4. Nuts definitely are not a source of which mineral in the diet?</b>                                            | Selenium               | 5                 | 2.7  | 4                     | 2.2  | 1                                  | 0.7  | 38.506  | <0.001* |
|                                                                                                                     | Iodine                 | 78                | 41.7 | 74                    | 40.9 | 28                                 | 20.0 |         |         |
|                                                                                                                     | Magnesium              | 19                | 10.2 | 6                     | 3.3  | 6                                  | 4.3  |         |         |
|                                                                                                                     | Iron                   | 11                | 5.9  | 9                     | 5.0  | 11                                 | 7.9  |         |         |
|                                                                                                                     | Zinc                   | 12                | 6.4  | 10                    | 5.5  | 8                                  | 5.7  |         |         |
|                                                                                                                     | I do not know          | 62                | 33.2 | 78                    | 43.1 | 86                                 | 61.4 |         |         |
| <b>5. Nuts are a rich source of which vitamin in the diet?</b>                                                      | vitamin A              | 10                | 5.3  | 8                     | 4.4  | 6                                  | 4.3  | 60.534  | <0.001* |
|                                                                                                                     | vitamin C              | 7                 | 13.4 | 3                     | 1.7  | 4                                  | 2.9  |         |         |
|                                                                                                                     | vitamin E              | 107               | 57.2 | 63                    | 34.8 | 30                                 | 21.4 |         |         |
|                                                                                                                     | vitamin D              | 7                 | 13.4 | 8                     | 4.4  | 4                                  | 2.9  |         |         |
|                                                                                                                     | vitamin B12            | 25                | 13.4 | 36                    | 19.9 | 26                                 | 18.6 |         |         |
|                                                                                                                     | I do not know          | 31                | 16.6 | 63                    | 34.8 | 70                                 | 50.0 |         |         |
| <b>6. Which of the nuts</b>                                                                                         | Almond                 | 23                | 12.3 | 18                    | 9.9  | 11                                 | 7.9  | 27.946  | <0.001* |

|                                                                                                                                                                                                                                             |                      |     |      |     |      |     |      |        |         |
|---------------------------------------------------------------------------------------------------------------------------------------------------------------------------------------------------------------------------------------------|----------------------|-----|------|-----|------|-----|------|--------|---------|
| <b>representatives is considered a good source of dietary selenium?</b>                                                                                                                                                                     | Hazelnut             | 3   | 1.6  | 4   | 2.2  | 1   | 0.7  |        |         |
|                                                                                                                                                                                                                                             | Brazilian nut        | 54  | 28.9 | 44  | 24.3 | 23  | 16.4 |        |         |
|                                                                                                                                                                                                                                             | Walnut               | 13  | 7.0  | 11  | 6.1  | 2   | 1.4  |        |         |
|                                                                                                                                                                                                                                             | Cashew               | 31  | 16.6 | 19  | 10.5 | 19  | 13.6 |        |         |
|                                                                                                                                                                                                                                             | I do not know        | 63  | 33.7 | 85  | 47.0 | 84  | 60.0 |        |         |
| <b>7. Nuts are primarily a source of which polyunsaturated fatty acid?</b>                                                                                                                                                                  | EPA                  | 31  | 16.6 | 6   | 3.3  | 2   | 1.4  | 99.804 | <0.001* |
|                                                                                                                                                                                                                                             | DHA                  | 18  | 9.6  | 5   | 2.8  | 5   | 3.6  |        |         |
|                                                                                                                                                                                                                                             | linoleic acid        | 18  | 9.6  | 19  | 10.5 | 5   | 3.6  |        |         |
|                                                                                                                                                                                                                                             | alpha-linolenic acid | 38  | 20.3 | 20  | 11.0 | 5   | 3.6  |        |         |
|                                                                                                                                                                                                                                             | arachidonic acid     | 10  | 5.3  | 20  | 11.0 | 5   | 3.6  |        |         |
|                                                                                                                                                                                                                                             | I do not know        | 72  | 38.5 | 111 | 61.3 | 118 | 84.3 |        |         |
| <b>8. Which of nuts has the highest content of saturated fatty acids and is therefore the least recommended in the diet compared to other stone fruits?</b>                                                                                 | Peanuts              | 98  | 52.4 | 73  | 40.3 | 48  | 34.3 | 31.079 | 0.001*  |
|                                                                                                                                                                                                                                             | Almond               | 9   | 4.8  | 12  | 6.6  | 9   | 6.4  |        |         |
|                                                                                                                                                                                                                                             | Walnut               | 13  | 7.0  | 7   | 3.9  | 3   | 2.1  |        |         |
|                                                                                                                                                                                                                                             | Hazelnut             | 2   | 1.1  | 3   | 1.7  | 3   | 2.1  |        |         |
|                                                                                                                                                                                                                                             | Cashew               | 26  | 13.9 | 13  | 7.2  | 17  | 12.1 |        |         |
|                                                                                                                                                                                                                                             | I do not know        | 39  | 20.9 | 73  | 40.3 | 60  | 42.9 |        |         |
| <b>9. There is an approved health claim for walnuts that reads: "Walnuts contribute to improving the elasticity of blood vessels." The stated health statement refers to the daily intake of walnuts in which of the stated quantities?</b> | 10g                  | 17  | 9.1  | 17  | 9.4  | 8   | 5.7  | 20.221 | 0.063   |
|                                                                                                                                                                                                                                             | 15g                  | 27  | 14.4 | 37  | 20.4 | 12  | 8.6  |        |         |
|                                                                                                                                                                                                                                             | 30g                  | 50  | 26.7 | 34  | 18.8 | 28  | 20.0 |        |         |
|                                                                                                                                                                                                                                             | 50g                  | 11  | 5.9  | 13  | 7.2  | 13  | 9.3  |        |         |
|                                                                                                                                                                                                                                             | 100g                 | 4   | 2.1  | 5   | 2.8  | 2   | 1.4  |        |         |
|                                                                                                                                                                                                                                             | more than 100g       | 0   | 0.0  | 0   | 0.0  | 1   | 0.7  |        |         |
|                                                                                                                                                                                                                                             | I do not know        | 78  | 41.7 | 75  | 41.4 | 76  | 54.3 |        |         |
| <b>10. Thermal processing of nuts impacts health effect, in which direction:</b>                                                                                                                                                            | Lowers               | 115 | 61.5 | 94  | 51.9 | 52  | 37.1 | 25.917 | <0.001* |
|                                                                                                                                                                                                                                             | Poincreases          | 9   | 4.8  | 6   | 3.3  | 4   | 2.9  |        |         |
|                                                                                                                                                                                                                                             | do not change        | 23  | 12.3 | 22  | 12.2 | 19  | 13.6 |        |         |
|                                                                                                                                                                                                                                             | I do not know        | 40  | 21.4 | 59  | 32.6 | 65  | 46.4 |        |         |
| <b>11. Thermal processing of nuts impacts allergenicity,</b>                                                                                                                                                                                | Lowers               | 52  | 27.8 | 31  | 17.1 | 13  | 9.3  | 32.174 | <0.001* |
|                                                                                                                                                                                                                                             | Poincreases          | 15  | 8.0  | 14  | 7.7  | 10  | 7.1  |        |         |

|                                                                                                                                               |                                   |    |      |     |      |     |      |        |         |
|-----------------------------------------------------------------------------------------------------------------------------------------------|-----------------------------------|----|------|-----|------|-----|------|--------|---------|
| <b>in which direction:</b>                                                                                                                    | do not change                     | 60 | 32.1 | 51  | 28.2 | 32  | 22.9 |        |         |
|                                                                                                                                               | I do not know                     | 60 | 32.1 | 85  | 47.0 | 85  | 60.7 |        |         |
| <b>12. According to its composition and health effects, peanuts can be counted as a nut, even though it belongs to the leguminous family:</b> | True                              | 99 | 52.9 | 89  | 49.2 | 43  | 30.7 | 29.766 | <0.001* |
|                                                                                                                                               | False                             | 21 | 11.2 | 13  | 7.2  | 6   | 4.3  |        |         |
|                                                                                                                                               | I do not know                     | 67 | 35.8 | 79  | 43.6 | 91  | 65.0 |        |         |
| <b>13. By what characteristic does the chestnut significantly differ from other types of nuts?</b>                                            | low content of mineral substances | 7  | 3.7  | 4   | 2.2  | 5   | 3.6  | 21.723 | 0.005*  |
|                                                                                                                                               | lower content of vitamin C        | 9  | 4.8  | 4   | 2.2  | 5   | 3.6  |        |         |
|                                                                                                                                               | higher energy value               | 19 | 10.2 | 10  | 5.5  | 8   | 5.7  |        |         |
|                                                                                                                                               | higher carbohydrate content       | 58 | 31.0 | 42  | 23.2 | 21  | 15.0 |        |         |
|                                                                                                                                               | I do not know                     | 94 | 50.3 | 121 | 66.9 | 101 | 72.1 |        |         |
